# Supplementary material for: Host-Microbe Interactions in the Chemosynthetic Riftia pachyptila Symbiosis
Source: PubMed Central journal article supplement (PMC6918071; doi:10.1128/mbio.02243-19), 2019-12-17
Supplement: mBio.02243-19-s0001.pdf [file mBio.02243-19-s0001.pdf]

# Supplementary Online Material

## Host-Microbe Interactions in the Chemosynthetic *Riftia pachyptila* Symbiosis

Tjorven Hinzke<sup>1,2,3\*</sup>, Manuel Kleiner<sup>3,4</sup>, Corinna Breusing<sup>5</sup>, Horst Felbeck<sup>6</sup>, Robert Häsler<sup>7</sup>, Stefan M. Sievert<sup>8</sup>, Rabea Schlüter<sup>9</sup>, Philip Rosenstiel<sup>7</sup>, Thorsten B. H. Reusch<sup>10</sup>, Thomas Schweder<sup>1,2</sup>, Stephanie Markert<sup>1,2\*</sup>

1 Institute of Marine Biotechnology e. V., Greifswald, Germany

2 Institute of Pharmacy, Department of Pharmaceutical Biotechnology, University of Greifswald, Germany

3 Energy Bioengineering Group, University of Calgary, Canada

4 Department of Plant & Microbial Biology, North Carolina State University, Raleigh, USA

5 Monterey Bay Aquarium Research Institute, Moss Landing, USA

6 Scripps Institution of Oceanography, University of California San Diego, San Diego, USA

7 Institute of Clinical Molecular Biology (IKMB), Kiel University, Kiel, Germany

8 Biology Department, Woods Hole Oceanographic Institution, Woods Hole, Massachusetts, USA

9 Imaging Center of the Department of Biology, University of Greifswald, Germany

10 Marine Evolutionary Ecology, GEOMAR Helmholtz Centre for Ocean Research Kiel, Kiel, Germany

\*email addresses:

tjorven.hinzke@outlook.com

stephanie.markert@uni-greifswald.de

## Contents

This file: Supplementary Results and Discussion with Supplementary Figures

The following Supplementary Tables are provided as separate sheets in the Supplementary Excel file:

|                 |                                                                                                                        |
|-----------------|------------------------------------------------------------------------------------------------------------------------|
| Supp. Table S1a | All <i>Riftia</i> host proteins identified in this study                                                               |
| Supp. Table S1b | Potential autophagy-related <i>Riftia</i> proteins                                                                     |
| Supp. Table S1c | Potential <i>Riftia</i> antimicrobial peptides                                                                         |
| Supp. Table S1d | Genomes and metagenomes used for SMART analysis of eukaryote-like protein structures                                   |
| Supp. Table S1e | Sampling dates, cruise number and number of biological replicates of <i>Riftia</i> samples used in this study          |
| Supp. Table S1f | Number of proteins with significant abundance differences in pairwise comparisons of <i>Riftia</i> tissues             |
| Supp. Table S1g | All <i>Riftia</i> symbiont proteins identified in this study                                                           |
| Supp. Table S1h | Hemerythrin and myohemerythrin isoforms in <i>Riftia</i> and other invertebrates used for alignment in Supp. Figure S3 |
| Supp. Table S1i | Carbonic anhydrase isoforms in <i>Riftia</i> as detected in this study and described in the literature                 |

The following Supplementary Tables are provided as separate PDF files:

|                |                                                                                                                                                          |
|----------------|----------------------------------------------------------------------------------------------------------------------------------------------------------|
| Supp. Table S2 | Domains and protein families with a putative role in host-symbiont interactions                                                                          |
| Supp. Table S3 | Transcriptome completeness for the four different <i>Riftia</i> transcriptome assemblies based on the BUSCO eukaryote and metazoan datasets              |
| Supp. Table S4 | Tools used to characterize <i>Riftia</i> host and symbiont proteins included in the combined <i>Riftia</i> host and symbiont database used in this study |

## Supplementary Results and Discussion

### 1) General overview

We identified a total of 3,838 *Riftia* host proteins (Supp. Table S1a). Many of these proteins showed statistically significant differences in their relative abundance between tissues (see Supp. Table S1f for total numbers of proteins with significantly different abundances). The “core” proteome of about 700 proteins, which were identified in all host organs under both environmental conditions (i.e. S-rich and S-depleted specimens; Supp. Figure S1), included ribosomal proteins, proteins involved in RNA-, amino acid- and protein metabolism, energy generation, globins, signaling pathways, oxidative stress response as well as cytoskeletal proteins, which are all important throughout the animal. Host proteins only present in the symbiont-bearing trophosome included digestive proteins, stress proteins, sulfate transporters, some histones and proteins involved in amino acid degradation (Supp. Figure S1). Proteins exclusively identified in the plumes included proteins involved in RNA metabolism, apoptosis, carbonic anhydrases, cell division, cytoskeleton and the extracellular matrix, the immune system, signal transduction, and mitochondrial ribosomes. Only identified in the vestimentum were cytoskeletal proteins, proteins of the extracellular matrix, galaxins, proteins involved in chitin degradation and intracellular trafficking (Supp. Table S1a).

Moreover, we identified a total of 1,016 symbiont proteins in the trophosome samples (Supp. Table S1g). Proteins identified in both S-rich and S-depleted symbionts belonged to all main metabolic pathways. Proteins exclusively identified in S-rich symbionts included ribosomal proteins as well as proteins involved in amino acid-, lipid-, and cofactor biosynthesis, nitrogen metabolism, transcription and translation. Proteins only identified in S-depleted symbionts were mostly low-abundant and included mainly hypothetical proteins and a porin. While we did identify a total of 12 symbiont proteins in other tissues than the trophosome, only four of them were present in more than one biological replicate of vestimentum and/or plume samples. These four belonged to the most abundant symbiont proteins (i.e. adenylylsulfate reductase subunits A and B, RubisCO and porin), and are therefore likely contaminations from the dissection procedure. More analyses are necessary to clarify whether the low-abundance proteins are contaminations or proteins secreted by the symbiont.

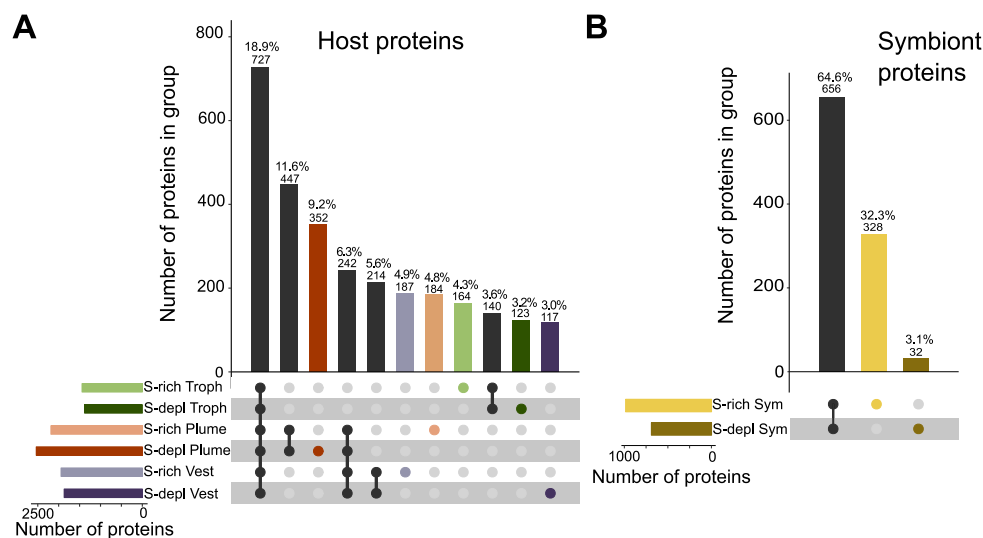

30

31 Supp. Figure S1: Overview of the *Riftia* symbiosis metaproteome. A) Intersection plot of the detected *Riftia* host

32 tissue proteins. Bars in the lower left part show the total number of proteins identified in the respective tissue,

33 i.e. in trophosome (Troph), plume or vestimentum (Vest), and condition, i.e. S-depleted (S-depl) or S-rich.

34 Dark/colored dots in the lower right part indicate the samples (single dots) or sample groups (chained dots)

35 in which the proteins are present, equivalent to intersections in a Venn diagram. Columns in the upper part

36 indicate the number and percentage of proteins which are exclusively present in the respective sample or

37 sample group. Shown are selected intersections. B) Intersection plot of *Riftia* symbiont proteins detected in

38 trophosome tissue. Colors in the figures are specific to the respective tissue/symbionts (e.g. yellow for S-rich

39 symbionts, dark green for host proteins from S-depleted trophosome, etc.).

40

## 41 2) Stress reactions and apoptosis in *Riftia* tissues

42 We identified heat shock proteins and other chaperones as well as universal stress proteins (USPs)

43 of the host in comparatively high total abundances in the trophosome. Four USPs were significantly

44 more abundant in trophosome samples than in the other tissues. Heat shock proteins and other

45 chaperones could be involved in protecting host proteins and DNA in the trophosome against reactive

46 oxygen species (ROS) and toxic sulfur compounds. These toxic compounds could be generated in the

47 course of respiration, symbiont sulfur oxidation and/or symbiont digestion by the host. This would

48 be in accordance with observations in *Bathymodiolus azoricus*, where higher HSP70 levels in the gills

49 than in the mantle were suggested to be a reaction to oxygen and sulfur radicals produced by the

50 symbionts (1). Higher HSP70 levels were furthermore shown to concur with a higher stress tolerance

51 in *Mytilus edulis* (2). While the exact function of USPs is still unknown, they have been observed to be

52 expressed in *Escherichia coli* under various stress conditions (3). In metazoans, proteins with USP

53 domains could have diverse functions in different taxa. USPs of *Hydra* might be involved in protection

54 against microbial infection (4). The *Riftia* USPs could therefore be involved in stress reactions, e.g.

55 caused by symbiont digestion and subsequent host bacteriocyte death, and in interaction with the  
56 symbiont population.

57 Apoptosis-related proteins, specifically calpains and caspases, on the other hand, were less abundant  
58 in the trophosome and rather abundant in the plume: We observed about 4 to 7 times lower levels of  
59 calpains in the trophosome than in the plume and vestimentum, and caspases were hardly detected  
60 at all in the trophosome, but almost exclusively present in the plume. Apoptosis is probably of higher  
61 importance in the plume, as this organ is in direct contact with sulfide-rich water, whereas in the  
62 trophosome, another mechanism could be involved in cell death (Main Text). In sulfide-rich  
63 environments, ROS are generated (5), which – like sulfide – could cause cell damage, necessitating  
64 fast cell turnover. In the trophosome, on the other hand, cell turnover might involve a cathepsin-  
65 dependent mechanism (Main Text).

66

### 67 3) Release of organic compounds as a possible mode of nutrient transfer from 68 symbiont to host

69 Besides symbiont digestion (Main Text), release of organic carbon by intact symbionts (“milking”)  
70 might also be a relevant mode of nutrient transfer from symbiont to host (6, 7). Our calculation in  
71 host tissues and symbionts with Calis-p (8) showed  $\delta^{13}\text{C}$  values of -6.7 to -8.3 in host tissues, whereas  
72 the symbionts were slightly lighter with a  $\delta^{13}\text{C}$  of -9.8 in S-rich and -11.7 in S-depleted symbionts  
73 (Supp. Figure S2).  $\text{CO}_2$  fixation via the Calvin cycle yields organic matter with lighter  $\delta^{13}\text{C}$  values than  
74 organic carbon generated by the reverse TCA (rTCA) cycle (9, 10). The  $\delta^{13}\text{C}$  values we calculated for  
75 *Riftia*, which correspond well to those reported in the literature (11), might therefore indicate  
76 selective differential export or leakage of small organic compounds derived from the symbiont’s rTCA  
77 cycle, rather than from the Calvin cycle. On the other hand, the accuracy of the SIF method is limited  
78 compared to the isotope ratio mass spectrometry (IRMS) gold standard (8). Additionally, we did not  
79 find a dedicated sugar transporter or organic acid exporter in the symbiont proteome and the  
80 dissimilar isotopic ratios might also be explained by less discriminating anaplerotic reactions in host  
81 tissues, e.g. catalyzed by phosphoenolpyruvate carboxykinase (PEPCK), which we detected in all  
82 tissues.

83 Additional circumstantial evidence for milking in the *Riftia* symbiosis might be provided by our  
84 comparison of S-rich and S-depleted trophosomes, in which we observed quite dissimilar  
85 abundances of digestion enzymes. In S-depleted *Riftia* specimens, symbionts likely secrete less (or

86 no) carbon compounds than in S-rich specimens, due to reduced CO<sub>2</sub> fixation. Therefore, the host  
 87 probably needs to increase digestion pressure on the symbionts to cover its own basic nutritional  
 88 demands. In S-rich specimens, on the other hand, lower digestion rates might be required, because  
 89 the symbionts leak more organic material to the host. Moreover, it might be possible that the host  
 90 preferentially digests symbionts with lower S content to avoid high sulfur levels. A similar strategy  
 91 of preferred digestion of S-depleted symbionts was suggested for the *Codakia orbicularis* symbiosis  
 92 (12). Whether milking really is a relevant process in the *Riftia* symbiosis remains to be elucidated.  
 93 Possibly, the *Riftia* host relies on a combination of symbiont digestion and milking, where the relative  
 94 importance of both processes depends on the environmental conditions. Relative contributions of  
 95 symbiont digestion and actively released symbiont-derived nutrients to the host's diet may vary  
 96 considerably in different symbioses, as shown in the *Zoothamnium niveum*-*Ca. Thiobios*  
 97 *zoothamnocoli* symbiosis (13), and in the flatworm *Paracatenula* symbiosis (14).

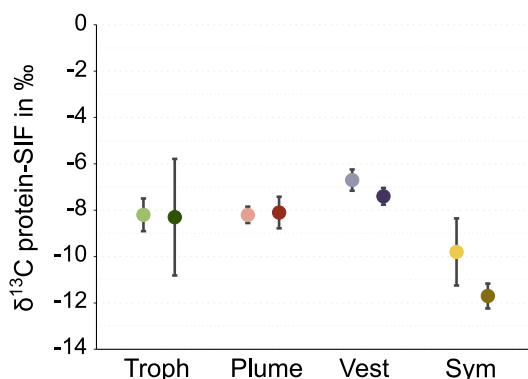

98  
 99 Supp. Figure S2: δ<sup>13</sup>C values of *Riftia* host tissues and symbiont cells, calculated from the metaproteomics data  
 100 using Calis-p (8). SIF: stable isotope fingerprinting. Light-colored symbols indicate S-rich tissues/symbionts,  
 101 dark symbols indicate S-depleted tissues/symbionts. Error bars indicate standard error of the mean. Troph:  
 102 trophosome, Vest: vestimentum, Sym: enriched symbiont fraction.

103

#### 104 4) Sulfur metabolism in host tissues

105 *Riftia* is well known to circumvent toxic effects of sulfide on its eukaryotic tissues by efficiently and  
 106 reversibly binding sulfide to hemoglobins (15). In addition, the animal may be able to oxidize sulfide  
 107 in its mitochondria, which would effectively also result in sulfide detoxification. We detected the  
 108 mitochondrial host enzymes sulfide:quinone oxidoreductase, persulfide dioxygenase, thiosulfate  
 109 sulfurtransferase and putative thiosulfate sulfurtransferases, which could serve to oxidize sulfide to  
 110 the less toxic thiosulfate (16). All these enzymes were low-abundant, however. In contrast to other  
 111 animals in sulfidic habitats, for which mitochondrial sulfide oxidation is the only available

112 mechanism to avoid sulfide toxicity (17–19), this strategy thus seems to be of minor importance in  
113 *Riftia*. For some thiotrophic symbionts, e.g. of *Bathymodiolus* mussels, thiosulfate appears to be the  
114 preferred sulfur form (20), and mitochondrial sulfide oxidation to thiosulfate thus likely also  
115 promotes symbiont energy generation. As *Riftia* symbionts prefer sulfide (even though they can  
116 probably also use thiosulfate; (21–23)), they would presumably not benefit from mitochondrial  
117 sulfide oxidation by the host.

118 Sulfate, produced by the symbionts as end product of sulfide oxidation, could be excreted via the  
119 host's sodium-independent sulfate anion transporters detected in the trophosome (after being  
120 released from the symbionts with their own sulfate transporter). The host could even use this sulfate  
121 for its own biosynthetic processes via a bifunctional 3'-phosphoadenosine 5'-phosphosulfate  
122 synthase, which we detected in all vestimentum samples.

123

## 124 5) *Riftia* globins are even more diverse than previously thought

125 *Riftia's* extracellular hemoglobins have been thoroughly studied and are well known for their  
126 capacity to simultaneously bind O<sub>2</sub> and sulfide ((24–27), reviewed in (15, 28)). In contrast,  
127 intracellular *Riftia* globins have received almost no attention thus far. Sanchez et al. (29) reported an  
128 intracellular *Riftia* globin, to which none of the globins detected in our study produced a close  
129 alignment. This indicates considerable diversity of this hitherto neglected protein group in *Riftia*.  
130 Intracellular globins have been described in few other annelid species; only three families are known  
131 to have circulating and non-circulating globins in addition to extracellular globins (reviewed in (30)).  
132 *Riftia* might possess, in addition to its extracellular hemoglobins, also the other two globin types,  
133 which would make it the first described member of the *Siboglinidae* to have this trait: The related  
134 siboglinid worm *Lamellibrachia* has coelomocytes (31), indicating that these cells could also be  
135 present in *Riftia*. Coelomocytes could contain intracellular, circulating globins, while *Riftia's*  
136 intracellular neuroglobins might be non-circulating. Intra- and extracellular globins have also been  
137 described in the deep-sea alvinellid *Alvinella pompejana*, where they might buffer against variations  
138 in environmental O<sub>2</sub> concentration (32). In vertebrates, intracellular globins like cytoglobin and  
139 neuroglobin might be involved in intracellular O<sub>2</sub> storage and transport or may have a protective  
140 function against ROS or nitrous oxide, whereas cytoglobin might also have a role in collagen  
141 production (33). The role of *Riftia's* intracellular globins awaits further testing.

142

143 6) *Riftia* myohemerythrins as possible multi-purpose proteins

144 We detected myohemerythrins as additional possible O<sub>2</sub>-binding molecules besides the well-  
145 described hemoglobins in *Riftia*. Hemerythrins are oxygen-binding molecules that can bind 15-28%  
146 more oxygen than simple hemes (34). Myohemerythrin is hemerythrin localized in (annelid) muscle  
147 cells (reviewed in (35)).

148 Our protein analysis showed a tissue-specific abundance pattern of the nine detected *Riftia*  
149 myohemerythrins. We therefore analyzed the sequences of these proteins to find indications for their  
150 respective functions. Additionally, we included hemerythrin sequences of annelids, a brachiopod and  
151 a member of the Bryozoa from the NCBI database (<https://www.ncbi.nlm.nih.gov/>) in our  
152 comparison (Supp. Figure S3, Supp. Table S1h). Almost all of the conserved sites that exist in  
153 hemerythrins (as outlined by Stenkamp (36)) are present in most *Riftia* myohemerythrins. One  
154 residue likely involved in O<sub>2</sub> binding has been described to either be a leucine or an isoleucine (36).  
155 This residue corresponds to residue 76 (the positions refer to *Riftia*\_myoHr6 in Supp. Figure S3),  
156 which is an isoleucine in most of the *Riftia* myohemerythrins, but a leucine in two sequences, both of  
157 which are significantly less abundant in the plume than in the trophosome samples. In the same  
158 sequences, residue 117 has been replaced by phenylalanine. This replacement has been noted before  
159 (37) for one *Riftia* myohemerythrin sequence (ABW24415.1), which corresponds to  
160 Host\_DN34237\_c2\_g1\_i1::g.35857 analyzed in our study (Host\_DN34237\_c2\_g1\_i1::g.35857 is just 10  
161 amino acids longer at the N terminus). Additionally, the six myohemerythrins with significantly  
162 higher abundance in the plume have several identical regions which differ from at least two of the  
163 other three myohemerythrins (Supp. Figure S3). While those are not assigned a specific function and  
164 we can therefore only speculate about their biological effect, these different variants nevertheless  
165 point to functional, tissue-specific diversification of the *Riftia* myohemerythrins. Possibly, the  
166 myohemerythrins in the trophosome are involved in interactions with the symbionts, whereas the  
167 plume-located myohemerythrins play a more general role in O<sub>2</sub> metabolism. A trophosome-specific  
168 *Riftia* myohemerythrin analyzed by Sanchez (37) was suggested to be involved in protection against  
169 O<sub>2</sub> radicals, especially as potentially high radical production occurs in the trophosome. While  
170 reversible O<sub>2</sub> binding by an overexpressed *Riftia* myohemerythrin could not be shown by Sanchez  
171 (37), this does not rule out *Riftia* myohemerythrin functioning as an O<sub>2</sub> carrier, as it is apparently not  
172 uncommon that purified hemerythrins do not bind O<sub>2</sub> (38). Myohemerythrins have been noted to  
173 fulfill similar functions as myoglobin, which generate an O<sub>2</sub> gradient to the mitochondria (39). Heart  
174 and skeletal muscle cells as well as rhizobium nodules use myoglobin or leghemoglobin, respectively,



175 to transport O<sub>2</sub> to the mitochondria/bacteroids. Leghemoglobin additionally likely protects the  
176 bacteroids against O<sub>2</sub> diffusion inside the cells, which contain the highly O<sub>2</sub>-sensitive nitrogenase  
177 (reviewed in (40)). *Riftia* myohemerythrin in the trophosome could fulfill a similar function in  
178 provisioning the symbionts with O<sub>2</sub> while protecting them from free O<sub>2</sub> (41). This might also enable  
179 the symbionts to use the O<sub>2</sub>-sensitive rTCA cycle while respiring O<sub>2</sub>. Additionally, the *Riftia*  
180 myohemerythrin in the trophosome could be involved in regulating symbiont access to metals. For a  
181 hemerythrin-like protein in *Nereis diversicolor*, for example, it has been suggested that it regulates  
182 cadmium levels, as it binds cadmium in the gut (42).

183 *Riftia* myohemerythrins which are more abundant in the plume might be involved in maintaining an  
184 O<sub>2</sub> gradient across the plume and thereby facilitate oxygen diffusion into the animal. Additionally,  
185 they could store oxygen, as suggested for sipunculans during low tides (34) and as proposed for the  
186 symbiotic oligochaete *Olavius algarvensis* (43).

187 Moreover, *Riftia* myohemerythrins in general might serve further purposes as observed in other  
188 animals, e.g. iron storage, metal detoxification and functions in the immune system (37–39, 44).  
189 Potentially, they might even be involved in nitrate transport, as nitrate binding and concentrating by  
190 *Riftia* blood was observed (45). The exact function and (sub-) cellular localization of the different  
191 myohemerythrins deserves future studies, especially as an association with muscle cells in the non-  
192 muscular trophosome tissue seems unlikely. We rather speculate that myohemerythrin is contained  
193 in host bacteriocytes.

194

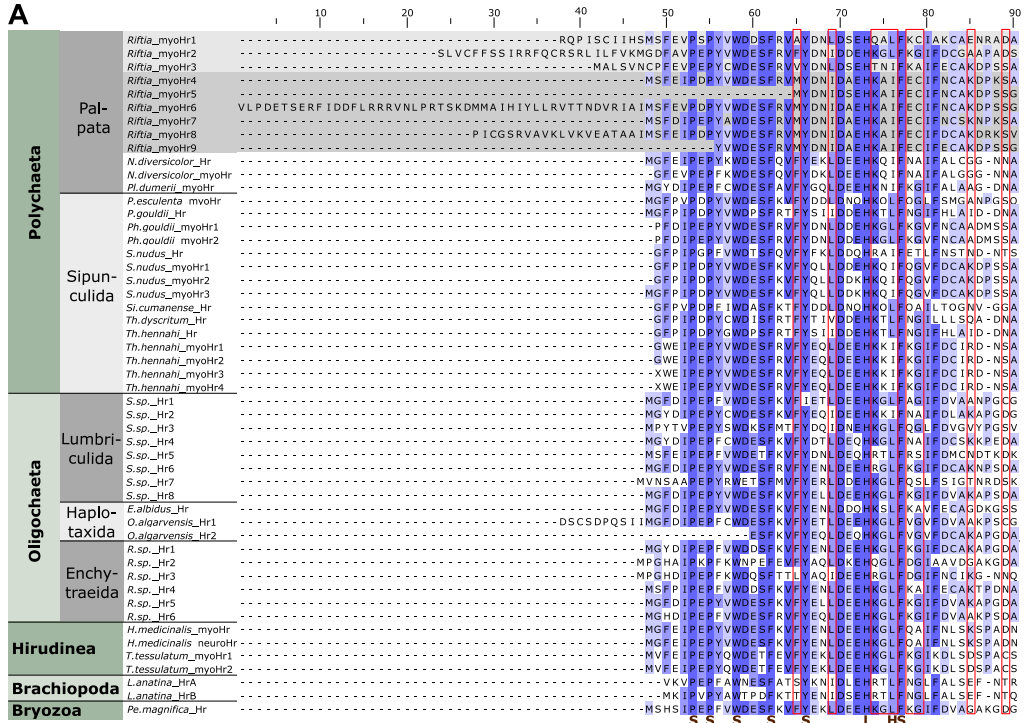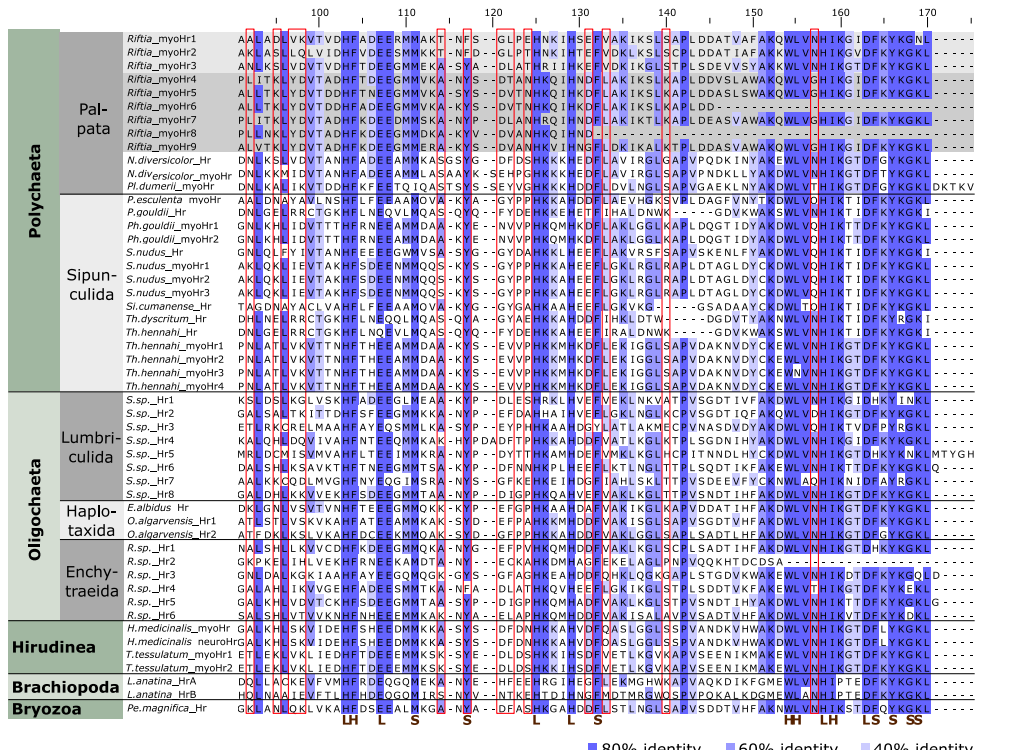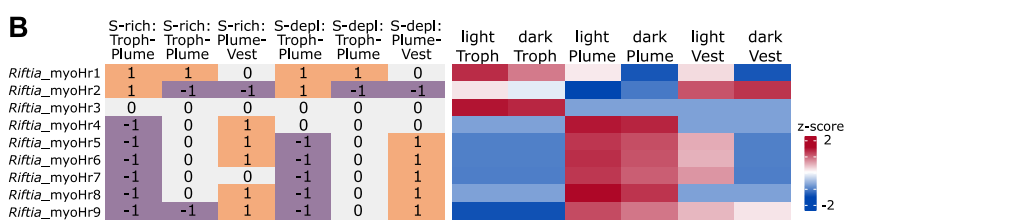

196 Supp. Figure S3: A) Alignment of *Riftia* myohemerythrins with myohemerythrins of various other invertebrates  
197 (Supp. Table S1h). Conserved residues according to Stenkamp (36) are marked as follows: L: iron ligand  
198 binding, S: suggested to have a structural role, H: hydrophobic residues in O<sub>2</sub>-binding pocket. Red boxes denote  
199 residues which are identical in one *Riftia* myohemerythrin subgroup (subgroups were separated by their  
200 distinct abundance patterns and are shown with different grey backgrounds) and different from at least two  
201 thirds of the sequences in the other subgroup. B) Left side, significance of abundance differences of detected  
202 myohemerythrins in *Riftia* tissues. 1: Significantly more abundant in the first tissue than in the second tissue, -1:  
203 significantly less abundant in the first than second tissue, 0: no significant difference. Right side, heatmap of  
204 the z-scored %orgNSAF abundance of myohemerythrins in the different *Riftia* tissues. For accession numbers,  
205 see Supp. Table S1h.

206

## 207 7) *Riftia* carbonic anhydrases are tissue-specific

208 *Riftia* expresses abundant carbonic anhydrases (CA) for interconversion of CO<sub>2</sub> and HCO<sub>3</sub><sup>-</sup> (Main  
209 text). Apparently, distinct isoforms dominate in different tissues (Main Text, Supp. Figure S4). Tissue-  
210 specific expression of *Riftia* CA has been noted before (46, 47). Three of the CAs detected in our study  
211 align closely to the CAs analyzed in these previous studies (Supp. Figure S4). Previous biochemical  
212 experiments hinted towards the existence of membrane-bound *Riftia* CA (47, 48). Indeed, predicted  
213 transmembrane helices and/or signal peptides in three of the CA sequences in our study indicate that  
214 these could be membrane-bound (or even secreted) rather than cytoplasmic. These three CAs also  
215 align more closely to each other than to the other CA sequences (Supp. Figure S4). Interestingly,  
216 putative membrane-bound CA isoforms seem not to be restricted to one tissue, but might increase  
217 CO<sub>2</sub> transport efficiency across different tissues. The residues involved in zinc binding and several of  
218 the residues forming the hydrogen bond of the active site according to De Cian et al. (47) seem not to  
219 be conserved across all *Riftia* CA isoforms, indicating possible functional diversification.

220

221

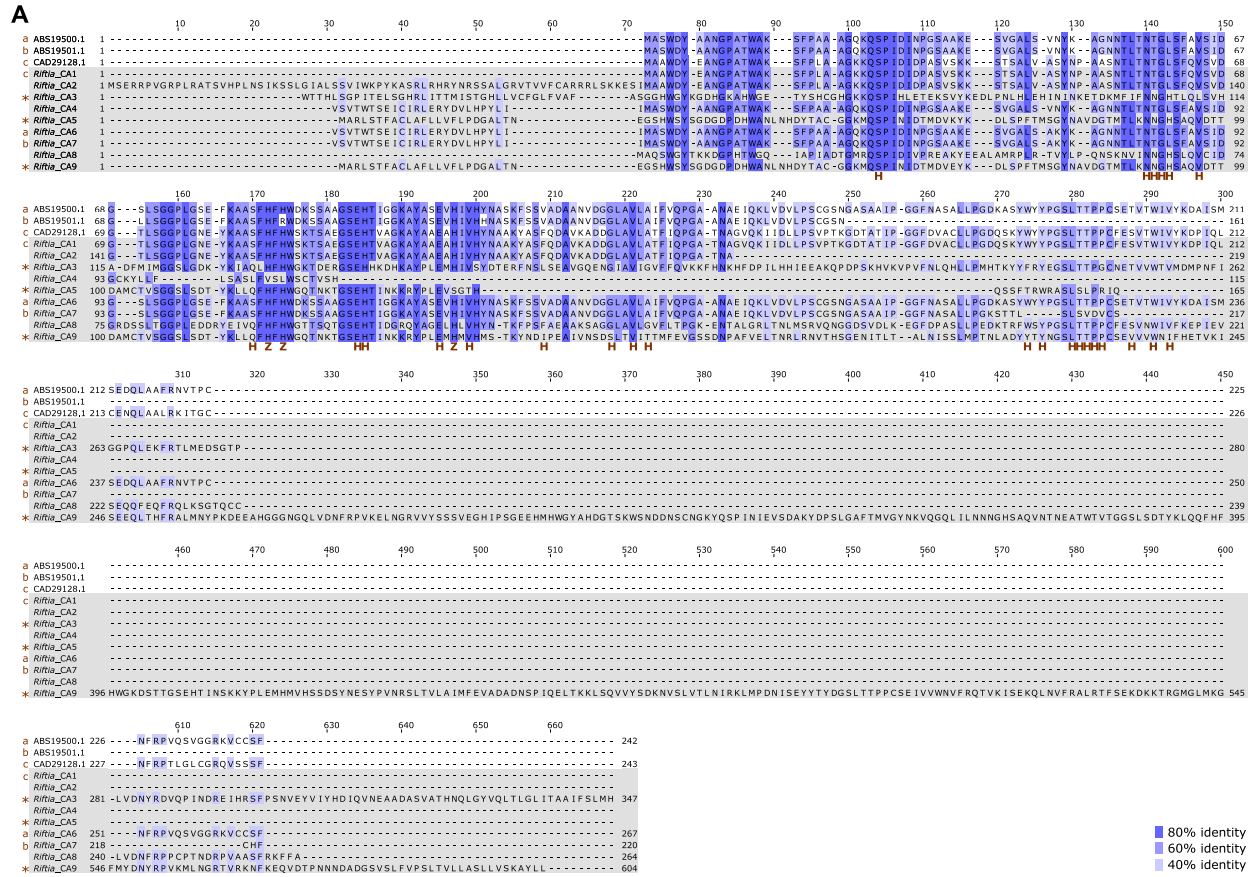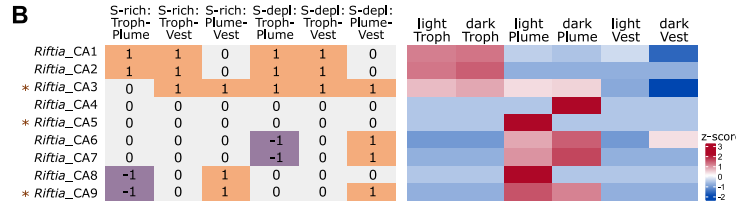

Supp. Figure S4: A) Alignment of carbonic anhydrases (CAs) detected in this study (*Riftia\_CA1* – *Riftia\_CA9*) and CAs detected in previous studies ((46, 47), for accession numbers see Supp. Table S1i). Lower case letters indicate which CA sequences identified in our study align most closely to the sequences identified in previous studies. Asterisks mark potentially membrane-bound/secreted CA isoforms. Capital letters mark residues involved in functions according to De Cian et al. (47). H: residues forming the hydrogen bond network of the active site, Z: histidine residues involved in zinc binding. B) Left side, significance of abundance differences of detected CAs in the *Riftia* tissue comparisons. 1: Significantly more abundant in the first tissue than in the second tissue, -1: significantly less abundant in the first than second tissue, 0: no significant difference. Right side, heatmap of the z-scored %orgNSAF abundance of CA in the different *Riftia* tissues. For accession numbers, see Supp. Table S1i.

### 8) C<sub>4</sub> metabolism in the *Riftia* host?

We detected proteins involved in transport of inorganic carbon by the *Riftia* host to its symbiont, i.e., V-type ATPase subunits, carbonic anhydrase and bicarbonate exchangers (Main Text Figure 2). In

237 addition, it has previously been suggested that the host also provides the symbionts with pre-fixed  
238 CO<sub>2</sub>, i.e., with small organic compounds (49, 50). Phosphoenolpyruvate carboxykinase, which we  
239 detected in all host tissues, and pyruvate carboxylase, which was only lacking in S-rich plumes (Supp.  
240 Table S1a), catalyze incorporation of CO<sub>2</sub> into oxaloacetate, which would then be available for host  
241 and symbiont metabolism. Like for the *Riftia* symbiosis, host pre-concentration of CO<sub>2</sub> via  
242 phosphoenolpyruvate carboxykinase has been postulated for the *B. azoricus* symbiosis (20). On the  
243 other hand, pre-fixation of CO<sub>2</sub> in the *Riftia* symbiosis has been doubted by Childress et al. (51), who  
244 observed high levels of total CO<sub>2</sub> and CO<sub>2</sub> partial pressure in the blood of the tubeworm. Following  
245 this, <sup>14</sup>C-labelled malate and succinate formation in the plume observed by Felbeck (49) could also  
246 be due to anaplerotic host metabolism, rather than presenting a means to sustain the symbionts. If  
247 host pre-fixation of CO<sub>2</sub> would occur, the symbiont would either need transporters for uptake of the  
248 organic compounds, or the organic compounds would need to be decarboxylated inside the host  
249 cells, so that the symbiont could take up CO<sub>2</sub>. We found five symbiont TRAP transporter components  
250 in the trophosome samples, two of which were predicted to transport C<sub>4</sub> dicarboxylates, which could  
251 take up small organic CO<sub>2</sub> carriers. At the same time, import of these organic CO<sub>2</sub> transport molecules  
252 into the bacteriocyte (and maybe the symbiont cell) would probably rule out simultaneous leakage  
253 or export of small organic molecules by the symbiont to sustain the host (milking, see above), as  
254 uptake and concomitant release of small organic molecules by the bacteriocyte seems unlikely.  
255 Therefore, it remains speculative whether the *Riftia* host pre-fixes CO<sub>2</sub>, also in light of our  
256 metaproteomics data.

257

## 258 9) Nitrogen metabolism in the *Riftia* symbiosis

259 Our reconstruction of nitrogen metabolic pathways in the *Riftia* host and symbiont revealed that  
260 *Riftia* likely depends on ammonium supplied by the symbiont, but can synthesize pyrimidines and  
261 polyamines independently (main text, detailed below), while the host might degrade nitrogen-  
262 containing symbiont waste products.

263 We found two possible NO<sub>3</sub><sup>-</sup> transporters (probable peptide/nitrate transporter At3g43790:  
264 Host\_DN35983\_c1\_g1\_i7::g.173229, Host\_DN35983\_c1\_g1\_i4::g.173222) in the *Riftia* transcriptomes  
265 of all tissues, although not in the metaproteome. The respective proteins could be involved in NO<sub>3</sub><sup>-</sup>  
266 uptake from the environment and NO<sub>3</sub><sup>-</sup> transport inside the animal. Hypothetically, *Riftia*  
267 myohemerythrin, which was abundantly detected in the host metaproteome, might serve as a nitrate-

268 binding component in the blood, in addition to hemoglobin, which has previously been suggested to  
269 bind and concentrate  $\text{NO}_3^-$  (45). After transport to the symbionts, nitrate could be ammonified via  
270 the symbiont's membrane-bound nitrate reductase (NarGHIJ) and nitrite reductase (NirBD) (Main  
271 Text Figure 4). Although NarGHIJ is mainly known to be involved in dissimilatory nitrate reduction,  
272 i.e., respiration, assimilatory nitrate reduction via membrane-bound NarGHIJ and NirBD was  
273 demonstrated in *Mycobacterium tuberculosis* (52) and suggested for the symbiont of the tubeworm  
274 *Ridgeia piscesae* (53). Symbiont periplasmic nitrate reductase NapAB, of which we detected NapB in  
275 the metaproteome, could theoretically also be involved in assimilatory nitrate reduction ((53),  
276 reviewed in (54)). Both partners of the *Riftia* symbiosis could then incorporate ammonium into their  
277 organic matter via glutamine synthetase/glutamate synthase (GS-GOGAT cycle) as well as via  
278 glutamate dehydrogenase, all of which we detected on the protein level in host and symbiont. Host  
279 glutamate dehydrogenase was overall most abundant in the trophosome, compared to other tissues,  
280 possibly because the host metabolizes ammonia generated by the symbionts. Eukaryotic ammonium  
281 assimilation via the GS-GOGAT cycle and via glutamate dehydrogenase has previously been  
282 suggested in silkworms (55, 56), mosquitoes (57) and *R. piscesae* tubeworms (53).

283 Both symbiotic partners appear to be capable of producing the polyamine putrescine (Main Text  
284 Figure 4). This contradicts a previous, enzyme activity-based study, in which arginine decarboxylase  
285 and ornithine decarboxylase activity were presumed to be exclusively due to symbiont enzymes (58).  
286 Given the ubiquitous importance of polyamines (see below), it is probably advantageous for the host  
287 to be less dependent on the symbiont for polyamine synthesis, even more so during times of reduced  
288 symbiont digestion (i.e. in S-rich specimens, Main Text).

289 Our results suggest that *Riftia* degrades nitrogenous compounds via the urea cycle. We detected all  
290 urea cycle enzymes (except for nitroxide synthase and arginine deaminase, which are not required  
291 for the full cycle) in the host's proteome, although not all proteins were detected in all tissues. We  
292 also identified a urea-proton symporter, probably involved in urea excretion, in all plume samples  
293 and one vestimentum sample. Interestingly, the symbiont, unlike the host, does not seem to possess  
294 a complete urea cycle (Main Text Figure 4). As host arginase was significantly more abundant in the  
295 trophosome than in the other tissues, it probably serves to break down nitrogen-containing  
296 metabolites of host and symbiont. Taken together, our results point to a complete urea cycle in the  
297 *Riftia* trophosome, as previously indicated by biochemical analyses (59).

298

## 299 10) Host polyamines may be involved in host-symbiont interactions

300 We detected host spermine synthase and spermidine synthase, which synthesize the polyamines  
301 spermine and spermidine, only in the trophosome metaproteomes, but not in other tissues.  
302 Therefore, *Riftia* polyamines could have a role in symbiont-host interactions. Such a role for a  
303 polyamine has been suggested for *Shigella flexneri*, where cadaverine is likely involved in restricting  
304 the pathogen to the host phagocytic vacuole (60). Similarly, *Riftia* host polyamines could be involved  
305 in keeping the symbiont from spreading in the host tissue. Additionally, spermine could play a role  
306 in immune system suppression in the trophosome, as it has been shown to suppress an innate  
307 inflammation reaction in human cell cultures after lipopolysaccharide stimulation (61). In addition  
308 to these putative interaction-related functions, the polyamines of both *Riftia* host and symbiont  
309 probably also have more general roles: Polyamines are known to interact with DNA, RNA and  
310 proteins, are involved in reaction to oxidative and acid stress and apoptosis, and play a role in  
311 bacterial outer membrane biogenesis and functions. Polyamine levels are higher in actively  
312 proliferating cells (reviewed in (62–64)). This may explain the high abundance of polyamine-  
313 generating enzymes in *Riftia* trophosome, where host and symbiont cells proliferate at very high  
314 rates in the central parts of the trophosome lobules (65).

315

## 316 11) High FIH abundance points to hypoxic conditions in the *Riftia* trophosome

317 Our results indicate that *Riftia* sustains hypoxic conditions in the trophosome, which would benefit  
318 the microaerophilic symbionts. The hypoxia-inducible factor 1-alpha inhibitors (factor inhibiting  
319 HIF1a; FIH), which we detected almost exclusively in trophosome samples, are possibly involved in  
320 metabolic regulation under these conditions. FIH inhibits HIF1a, which is a main regulator of  
321 hypoxia-dependent transcription regulation, during normoxic conditions (66). While we did not  
322 detect HIF1a on the protein level, the presence of FIH very likely indicates that HIF1a is also  
323 expressed. A low (but detectable) abundance of FIH might indicate that HIF1a is not inhibited and  
324 the trophosome is hypoxic. High FIH abundance, on the other hand, would indicate HIF1a inhibition  
325 and thus more normoxic conditions, e.g. during temporary phases of higher O<sub>2</sub> concentration. The  
326 hypothesis of a hypoxic trophosome is in line with the observation that *Caenorhabditis elegans* HIF1a  
327 is induced by hypoxia and rapidly degraded under normoxic conditions (67). Further studies are  
328 needed to verify the presence of HIF1a and to elucidate the regulation of FIH itself under different O<sub>2</sub>  
329 regimes in *Riftia* trophosomes.

## 330 12) The *Riftia* immune system might protect the symbiosis against phages

331 The *Riftia* symbionts appear not to elicit a general host immune response, as a number of host  
332 immune proteins such as lysozyme, tyrosine-protein kinases and peptidoglycan recognition proteins  
333 were detected, but overall, their abundance in the trophosome was not higher than in other tissues  
334 (Main Text Figure 2). Galaxins, proteins associated with coral exoskeletons (68), have been implied  
335 in immune system and symbiont interaction functions in squids (69). While one galaxin transcript  
336 was detected before in the *Riftia* body wall (29), we only detected galaxins in the firm vestimentum  
337 tissue, implying that they could have a structural rather than an immune system function in *Riftia*.  
338 Most likely, the host vesicles in which the symbionts are contained shield the bacteria against  
339 recognition and attack by the *Riftia* immune system. Similarly, in chronic infections of insect hosts  
340 with endosymbionts, the host's immune system does not eliminate the symbionts (70). Rather than  
341 acting against the symbionts, the *Riftia* immune system probably protects the host (and thereby the  
342 symbiosis as a whole) against infections, and might even be involved in protecting the symbionts  
343 against phage infections. The symbiont population is basically a bacterial monoculture inside *Riftia*,  
344 for which phage infections could easily be fatal. The detection of CRISPR-Cas-associated proteins in  
345 the *Riftia* symbiont metaproteome might indicate that phage infections play a role during symbiosis.  
346 Symbionts could be prone to infection also inside the trophosome, as phages can rapidly penetrate  
347 tissues of higher organisms (71). Therefore, host proteins likely involved in interaction with viruses,  
348 e.g. interferon-induced GTP-binding proteins, glycopeptide N-tetradecanoyltransferase 2 and  
349 deoxynucleoside triphosphate triphosphohydrolase SAMHD1, could not only protect *Riftia* itself  
350 against a viral infection, but could putatively also be involved in shielding the symbionts against  
351 phages. The *Riftia* immune system could also be involved in initial identification of the symbiont  
352 during host colonization (e.g. via lectins which are present in the host's proteome). In the symbiotic  
353 stage, however, few and specific functions of the immune system seem to be harnessed for symbiotic  
354 interactions.

355

## 356 13) Roles of eukaryote-like proteins in *Ca. E. persephone* and other host-associated 357 and free-living organisms

358 We compared the proportion of proteins with putative roles in host-symbiont interactions, especially  
359 eukaryote-like proteins (ELPs), which are encoded in the metagenomes of several (endo)symbionts,  
360 pathogens, free-living bacteria and environmental samples (Main Text Figure 5, Supp Figure S5,



361 Supp. Table S2, Supp. Table S1d). The three *Riftia/Tevnia* symbiont metagenomes that were included  
362 in our protein database (see methods) showed, as expected, almost identical distribution patterns of  
363 the respective protein groups. As *Riftia* and *Tevnia jerichonana* are colonized by the same symbiont  
364 species (72, 73), differences are probably due to unequal sequencing coverage. The pattern observed  
365 in the *Ridgeia* symbiont metagenomes was very similar to that in the *Riftia/Tevnia* symbiont, which  
366 is in line with the fact that the *Ridgeia* symbiont likely belongs to the same species as the *Riftia* and  
367 *Tevnia* symbiont (73). The similarity of ELP patterns between the tubeworm symbionts and  
368 symbionts of shallow-water bivalves (Supp. Figure S5) suggests parallels in interaction strategies  
369 with their respective hosts.

370 We also observed differences in ELP distribution patterns between distinct organism groups (Supp.  
371 Figure S5), which points to specific environmental adaptations. Armadillo repeats, FG-GAP, GIDE,  
372 Hyr, Integrins, and TSP domains were almost exclusively found in the gammaproteobacterial sulfur-  
373 oxidizing endosymbionts, suggesting specialized roles in these associations. The low number of the  
374 respective genes in the *B. azoricus* sulfur-oxidizing endosymbiont metagenomes could be an artifact  
375 caused by the small and presumably rather incomplete metagenome databases available. On the  
376 other hand, whereas *Riftia* endosymbionts are probably actively digested by the host – and even more  
377 so in times of starvation – in *B. azoricus*, autolysis of senescent bacteria seems to be part of the normal  
378 cell cycle (74). This could explain a higher abundance of putative host interaction-related and  
379 presumably phagocytosis-inhibiting proteins in the *Riftia* symbiont, and in the symbionts of the  
380 shallow-water bivalves, which are probably also actively digested by their hosts (75–77). The *B.*  
381 *thermophilus* endosymbiont ELP distribution pattern was rather distinct from that of all other  
382 gammaproteobacterial SOX endosymbionts. The reasons for these differences, including especially  
383 the high abundance of attachment-related proteins in the *B. thermophilus* endosymbiont, remain  
384 open for debate.

385 Some domains, especially ankyrins, PD40 and WD40, Sel1, SNARE, TPR and coiled-coil domains are  
386 rather widespread and are also found in non-host-associated bacteria. This points to more general  
387 functions, which might have been harnessed in the course of symbiotic adaptations. Some of the  
388 analyzed host-associated bacteria, including the *Riftia* symbiont, are horizontally transmitted, i.e.  
389 taken up from the environment (78, 79). This could explain the relatively high similarity of these  
390 bacteria to the protein group pattern of free-living organisms and the diversity of protein groups. In  
391 comparison, obligate endosymbionts (including *Calymptogena* endosymbionts (80)), which undergo  
392 genome reduction and genetic drift, showed a reduced diversity of the analyzed protein groups.

393 Nipsnap domains are mainly found in rhizobia and could thus be involved more specifically in  
 394 rhizobia-plant interactions. As expected, the vent- and chimney metagenomes, which encompass a  
 395 variety of prokaryotic and eukaryotic microorganisms, had the highest total number of eukaryote-  
 396 like domain-containing proteins. Nevertheless, relative to the total number of proteins in the  
 397 respective (meta)genomes, some of these protein groups are under-represented in comparison to  
 398 the single bacteria analyzed, which indicates that ELP patterns may vary substantially between  
 399 microbes and appear to have specific functions in individual bacterial groups.

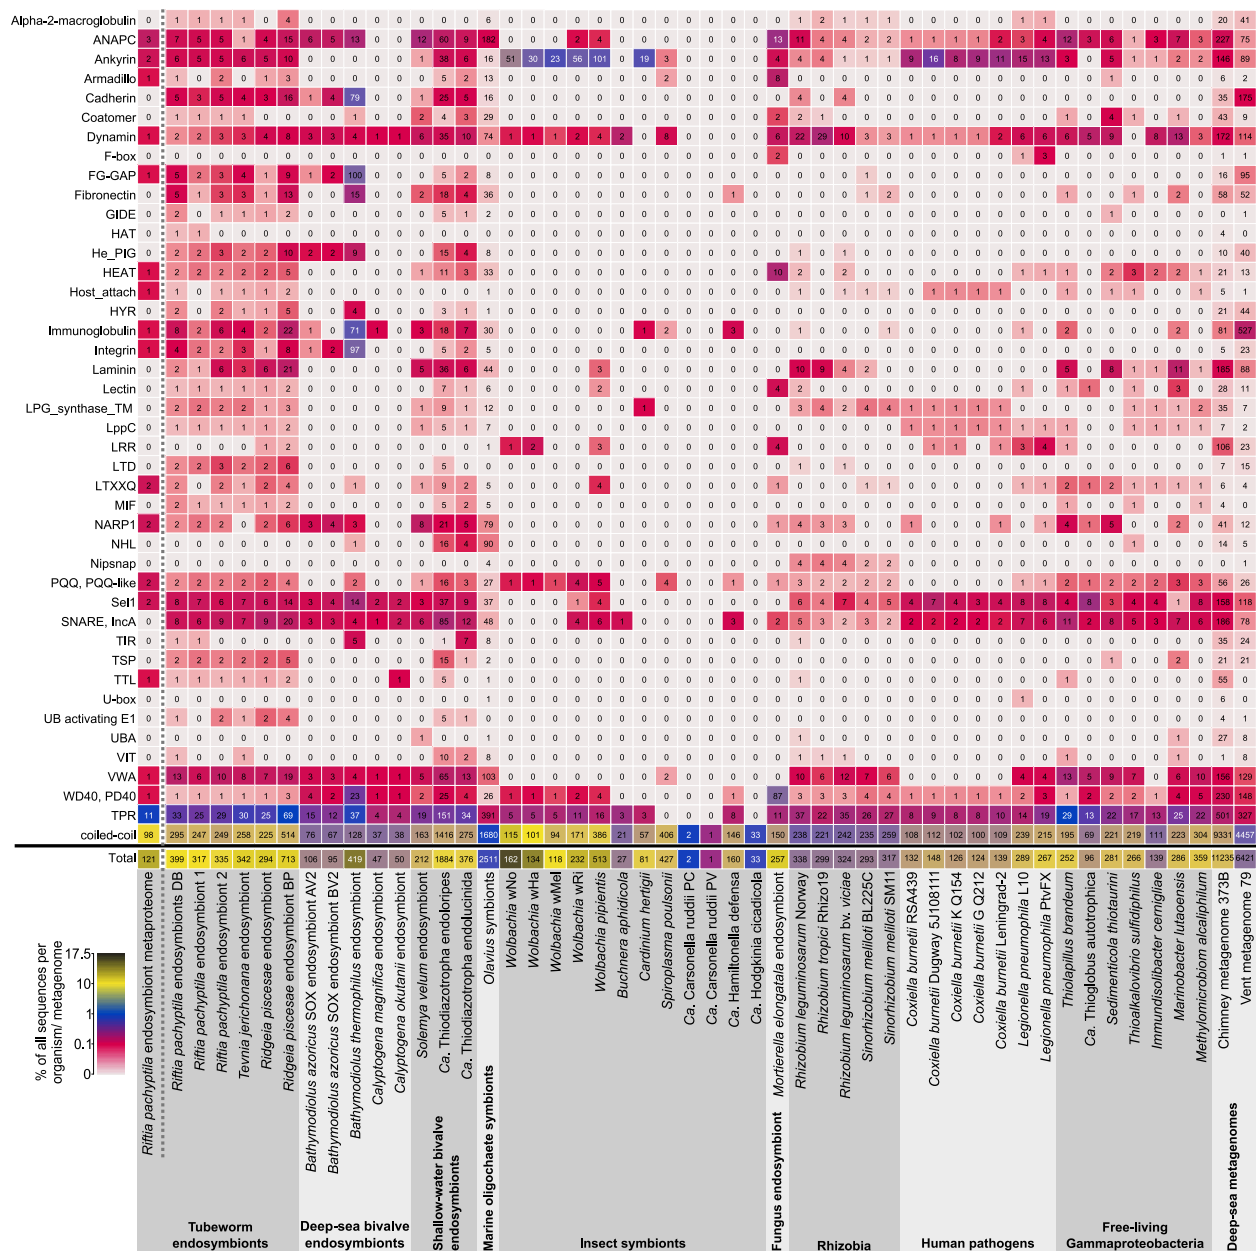

401 Supp. Figure S5: Selected domains with eukaryote-like structures and with putative functions in symbiont-host  
402 interactions in the *Riftia* symbiont and in selected other organism groups and environmental metagenomes.  
403 Color scale: percentage of genes/proteins with the respective domain relative to all genes/proteins, numbers:  
404 total number of genes/proteins with the respective domain. For details on the organisms, see Supp. Table S1d.  
405 For further information about the selected protein groups, see Supp. Table S2. '*Riftia pachyptila* endosymbiont  
406 metaproteome' refers to *Riftia* symbiont proteins detected in this study.

407

#### 408 14) Symbiosis-relevant proteins of *Ca. E. persephone* may facilitate host interactions

409 **Symbiont proteins might modulate host gene expression.** Our metaproteomic analyses suggest  
410 that host histones could interfere with the symbiont, because they can be precursors for  
411 antimicrobial peptides (AMPs, Main Text). The symbiont, on the other hand, could itself manipulate  
412 the host's histones, and thereby the host transcription regulation: We found the SET domain-  
413 containing protein Sym\_EGV51182.1 in the *Riftia* symbiont's metagenome (albeit not on the protein  
414 level). Sym\_EGV51182.1 had highest sequence similarity to several eukaryotic histone-lysine N-  
415 methyltransferases with 30-32% identity (BLASTP against Uniprot/Swissprot,  
416 <https://www.expasy.org/>). In *L. pneumophila*, a lowly expressed SET domain-containing  
417 methyltransferase trimethylates host histone H3 and thereby probably represses the expression of  
418 host genes, including genes of the innate immune system (81). The *Riftia* symbiont SET domain-  
419 containing protein might have a similar function and modulate gene expression of the host, possibly  
420 enabling symbiont persistence by repressing the host's immune response.

421

422 ***Ca. E. persephone* dodecin and porin may facilitate symbiont survival.** We detected a putative  
423 symbiont dodecin (Sym\_2601633487) in about 30 times higher abundance in symbionts from S-  
424 depleted trophosomes (0.886%orgNSAF, rank 16) than in symbionts from S-rich trophosomes  
425 (0.028%orgNSAF, rank 409). This protein could be involved in adaptation to conditions under S  
426 depletion, e.g. to a putatively increased digestion pressure. A BLAST search of the *Ca. E. persephone*  
427 putative dodecin against the Uniprot/Swissprot database (<https://web.expasy.org/blast/>) showed  
428 highest similarity to a *Halorhodospira halophila* dodecin (54% identity), followed by a *Thermus*  
429 *thermophilus* dodecin (45% identity). *H. halophila* dodecin was shown to bind the flavin FMN (82).  
430 Likewise, the dodecin of *T. thermophilus* binds FMN and coenzyme A. Dodecin could therefore work  
431 as a flavin trap, for example when flavins are released from denatured flavoproteins (83). Reduced  
432 flavins and flavoproteins generate ROS (84). The *Ca. E. persephone* dodecin could therefore  
433 counteract the detrimental effects of putatively higher oxygen levels in S-depleted trophosomes by

434 sequestering flavins, especially as probably less flavins are needed for redox reactions and electron  
435 transfers and additionally flavoproteins might be degraded due to the energy-limited conditions.  
436 Higher stress levels due to digestion could also facilitate flavin release from symbiont proteins.  
437 Sequestering these flavins by dodecin would decrease the potential for ROS formation. Specific  
438 involvement of dodecin in intracellular survival has been speculated for *M. tuberculosis*. This protein  
439 could be involved in survival of the pathogen under the acidic conditions in lysosomes, as the  
440 FMN:dodecin complex is more stable at a lower pH (85). Likewise, the *Riftia* dodecin could exert a  
441 protective influence during increased symbiont digestion in S-depleted trophosomes.

442 Besides dodecin, symbiont porins, the most abundant symbiont proteins, were also notably (about  
443 four times) more abundant in S-depleted symbionts (9.8%orgNSAF) than in S-rich symbionts  
444 (2.4%orgNSAF). Porins could be involved in interactions with the host by exporting symbiont  
445 effectors, or by im- or exporting host effectors, e.g. to modulate digestion (see also Main Text). Their  
446 higher abundance in S-depleted trophosomes could therefore be a reaction to the postulated higher  
447 digestion pressure. In the genetic neighborhood of the *Riftia* symbiont porin (*Riftia1* genome) are  
448 several genes with predicted functions in lipopolysaccharide biosynthesis, and sugar metabolism and  
449 RNA metabolism. However, the exact function of the *Ca. E. persephone* porin remains to be  
450 elucidated.

451

452 ***Ca. E. persephone* might be naturally competent during symbiosis.** Several of the symbiont  
453 proteins detected in this study indicate that the *Riftia* symbiont population is genetically competent  
454 during symbiosis and might exchange genetic material. The type 4 pilus (T4P) system might be  
455 involved in natural transformation (Main Text). Besides the T4P system, we identified proteins  
456 belonging to toxin-antitoxin-systems (putative zeta toxins Sym\_EGV52816.1, Sym\_EGW56021.1).  
457 These can be encoded on conjugative elements, so that bacteria which do not have these conjugative  
458 elements are killed (86). Additionally, proteins of the Tol-Pal-system were present in the *Ca. E.*  
459 *persephone* metaproteome. This system not only confers outer membrane stability, but is also  
460 involved in uptake of the mostly plasmid-encoded bacteriocin colicin A in *E. coli* (87, 88). Moreover,  
461 we detected two plasmid-related proteins (Sym\_EGV50018.1 – plasmid maintenance system killer,  
462 Sym\_EGV50285.1 – TraB family pAD1 protein). Previous genome analyses showed that the *Riftia*  
463 symbiont has an integrated partial F plasmid (*Riftia1* genome; (72)). Conjugation could allow the  
464 symbionts to exchange genetic material, potentially with a role in symbiosis. These results indicate

465 that strain adaptation and diversification of the *Riftia* symbiont might take place under symbiotic  
466 conditions.

467

## 468 15) Metabolite exchange between the symbiosis and the environment depends on S 469 availability

470 Lower S availability seems to not only impact the *Riftia* host's nutrition, but also its exchange of  
471 compounds with the environment and thereby its capacity to support the symbiont: We detected  
472 carbonic anhydrases (CAs) and FIH in higher total abundance in S-depleted specimens (summed  
473 %orgNSAF), whereas V-type ATPase subunits, myohemerythrin and cytoplasmic malate  
474 dehydrogenase were overall less abundant in S-depleted specimens. These differences are probably  
475 due to changes in the habitat chemistry: Sites with low sulfide concentrations (leading to low S  
476 availability for the symbiosis) are alkaline, whereas those with higher sulfide levels have an acidic to  
477 neutral pH (89). At the same time, higher sulfide concentrations implicate higher CO<sub>2</sub> levels, but  
478 lower O<sub>2</sub> concentrations. In plumes of *Riftia* specimens from habitats with low sulfide levels (and thus  
479 also low CO<sub>2</sub> levels), higher activities of carbonic anhydrase were measured (89). The higher  
480 abundances of carbonic anhydrases in trophosomes and plumes of S-depleted specimens thus  
481 probably serve to enable CO<sub>2</sub> uptake against a shallower concentration gradient (if CO<sub>2</sub> is taken up at  
482 all under these conditions). Moreover, as autotrophic metabolism of the symbionts is probably  
483 inhibited during sulfide depletion (90), CO<sub>2</sub> generated by host and symbiont respiration would need  
484 to be excreted in order to prevent metabolic acidosis. CA could then function to catalyze the  
485 conversion of bicarbonate to CO<sub>2</sub> to facilitate CO<sub>2</sub> diffusion into the environment. At the same time,  
486 the need for pH regulation seems to be decreased in S-depleted *Riftia*, as we detected a lower sum  
487 abundance of V-type ATPase subunits in plumes of these specimens. In S-depleted worms, less  
488 protons are generated during symbiont sulfide oxidation, which diminishes the need for ATP-  
489 consuming proton excretion.

490 Whereas reduced sulfur compounds, and potentially CO<sub>2</sub>, are probably limiting under S-depleted  
491 conditions, O<sub>2</sub> could be limiting in S-rich specimens: Myohemerythrin, which is potentially involved  
492 in O<sub>2</sub> storage and transport, had an about 2.9 times higher overall abundance in S-rich plumes and  
493 trophosomes than in S-depleted plumes and trophosomes. It might facilitate O<sub>2</sub> uptake and O<sub>2</sub>  
494 provision of the symbionts, which are relatively more abundant, and thus in total likely need more  
495 O<sub>2</sub>, in S-rich trophosomes. At the same time, trophosomes of S-rich specimens apparently still have

496 lower free O<sub>2</sub> levels, as indicated by about 10 times lower levels of FIH in S-rich trophosomes and  
497 higher malate dehydrogenase abundance (see above and Main Text). Although, on the one hand,  
498 hypoxic conditions would be beneficial for the microaerophilic symbionts, on the other hand, too low  
499 O<sub>2</sub> concentrations could limit sulfur oxidation and add to elemental sulfur accumulation in symbionts  
500 of S-rich *Riftia* specimens. While the symbionts are possibly capable of NO<sub>3</sub><sup>-</sup> respiration, this pathway  
501 probably plays only a minor role compared to O<sub>2</sub> respiration (91). Additionally, the energy gained  
502 from NO<sub>3</sub><sup>-</sup> respiration would be lower than that from aerobic respiration, due to the lower redox  
503 potential of NO<sub>3</sub><sup>-</sup>. The higher myohemerythrin abundance thus likely points to an increased O<sub>2</sub>  
504 demand in S-rich *Riftia* specimens. Similarly, myoglobin concentrations in vertebrate muscles  
505 increase with oxygen demand, and myoglobin expression depends at least partially on O<sub>2</sub> availability  
506 (reviewed in (40)).

507 The symbiont metaproteome profile also hints at more oxic conditions in S-depleted than S-rich  
508 trophosome: Two of the symbiont antioxidant proteins (Sym\_EGV49864.1 – rubrerythrin,  
509 Sym\_EGV52457.1 – putative hemerythrin) were significantly more abundant in the S-depleted  
510 symbionts. Moreover, it could be speculated that the symbionts are killed before digestion via an  
511 oxidative burst, as is the case for intracellular pathogenic bacteria (92). The higher antioxidant levels  
512 in S-depleted symbionts would then be a means to counteract the host-produced ROS. A role of  
513 hemerythrin for survival inside host macrophages via ROS detoxification has been suggested for  
514 *Aeromonas hydrophila*, a gram-negative gammaproteobacterium (93).

515

516

517 **References**

- 518 1. Pruski AM, Dixon DR. 2007. Heat shock protein expression pattern (HSP70) in the  
519 hydrothermal vent mussel *Bathymodiolus azoricus*. *Mar Environ Res* 64:209–224.
- 520 2. Tedengren M, Olsson B, Reimer O, Brown DC, Bradley BP. 2000. Heat pretreatment increases  
521 cadmium resistance and HSP 70 levels in Baltic Sea mussels. *Aquat Toxicol* 48:1–12.
- 522 3. Kvint K, Nachin L, Diez A, Nyström T. 2003. The bacterial universal stress protein: function  
523 and regulation. *Curr Opin Microbiol* 6:140–145.
- 524 4. Forêt S, Seneca F, de Jong D, Bieller A, Hemmrich G, Augustin R, Hayward DC, Ball EE, Bosch  
525 TCG, Agata K, Hassel M, Miller DJ. 2011. Phylogenomics reveals an anomalous distribution of  
526 USP genes in metazoans. *Mol Biol Evol* 28:153–161.
- 527 5. Tapley DW, Buettner GR, Shick JM. 1999. Free radicals and chemiluminescence as products  
528 of the spontaneous oxidation of sulfide in seawater, and their biological implications. *Biol*  
529 *Bull* 196:52–56.
- 530 6. Bright M, Keckeis H, Fisher CR. 2000. An autoradiographic examination of carbon fixation,  
531 transfer and utilization in the *Riftia pachyptila* symbiosis. *Mar Biol* 136:621–632.
- 532 7. Felbeck H, Jarchow J. 1998. Carbon release from purified chemoautotrophic bacterial  
533 symbionts of the hydrothermal vent tubeworm *Riftia pachyptila*. *Physiol Zool* 71:294–302.
- 534 8. Kleiner M, Dong X, Hinzke T, Wippler J, Thorson E, Mayer B, Strous M. 2018. Metaproteomics  
535 method to determine carbon sources and assimilation pathways of species in microbial  
536 communities. *Proc Natl Acad Sci U S A* 115:E5576–E5584.
- 537 9. Pearson A. 2010. Pathways of carbon assimilation and their impact on organic matter values  
538  $\delta^{13}\text{C}$ , p. 143–156. *In* Timmis, KN (ed.), *Handbook of Hydrocarbon and Lipid Microbiology*.  
539 Springer, Berlin, Heidelberg.
- 540 10. Hügler M, Sievert SM. 2011. Beyond the Calvin cycle: autotrophic carbon fixation in the  
541 ocean. *Ann Rev Mar Sci* 3:261–289.
- 542 11. Fisher CR, Kennicutt II MC, Brooks JM. 1990. Stable carbon isotopic evidence for carbon  
543 limitation in hydrothermal vent vestimentiferans. *Science* 247:1094–1096.
- 544 12. Caro A, Gros O, Got P, De Wit R, Troussellier M. 2007. Characterization of the population of  
545 the sulfur-oxidizing symbiont of *Codakia orbicularis* (Bivalvia, Lucinidae) by single-cell  
546 analyses. *Appl Environ Microbiol* 73:2101–2109.
- 547 13. Volland J-M, Schintlmeister A, Zambalos H, Reipert S, Mozetič P, Espada-Hinojosa S, Turk V,  
548 Wagner M, Bright M. 2018. NanoSIMS and tissue autoradiography reveal symbiont carbon  
549 fixation and organic carbon transfer to giant ciliate host. *ISME J* 12:714–727.

- 550 14. Jäckle O, Seah BKB, Tietjen M, Leisch N, Liebeke M, Kleiner M, Berg JS, Gruber-Vodicka HR.  
551 2019. Chemosynthetic symbiont with a drastically reduced genome serves as primary  
552 energy storage in the marine flatworm *Paracatenula*. Proc Natl Acad Sci 116:8505–8514.
- 553 15. Bailly X, Vinogradov S. 2005. The sulfide binding function of annelid hemoglobins: relic of an  
554 old biosystem? J Inorg Biochem 99:142–150.
- 555 16. Hildebrandt TM, Grieshaber MK. 2008. Three enzymatic activities catalyze the oxidation of  
556 sulfide to thiosulfate in mammalian and invertebrate mitochondria. FEBS J 275:3352–3361.
- 557 17. Grieshaber MK, Völkel S. 1998. Animal adaptations for tolerance and exploitation of  
558 poisonous sulfide. Annu Rev Physiol 33–53.
- 559 18. Powell MA, Somero GN. 1986. Adaptations to sulfide by hydrothermal vent animals: sites and  
560 mechanisms of detoxification and metabolism. Biol Bull 171:274–290.
- 561 19. Kraus DW, Doeller JE. 2004. Sulfide consumption by mussel gill mitochondria is not strictly  
562 tied to oxygen reduction: measurements using a novel polarographic sulfide sensor. J Exp  
563 Biol 207:3667–3679.
- 564 20. Ponnudurai R, Kleiner M, Sayavedra L, Petersen JM, Moche M, Otto A, Becher D, Takeuchi T,  
565 Satoh N, Dubilier N, Schweder T, Markert S. 2017. Metabolic and physiological  
566 interdependencies in the *Bathymodiolus azoricus* symbiosis. ISME J2016/11/02. 11:463–  
567 477.
- 568 21. Robidart JC, Roque A, Song P, Girguis PR. 2011. Linking hydrothermal geochemistry to  
569 organismal physiology: physiological versatility in *Riftia pachyptila* from sedimented and  
570 basalt-hosted vents. PLoS One 6:e21692.
- 571 22. Markert S, Gardebrecht A, Felbeck H, Sievert SM, Klose J, Becher D, Albrecht D, Thürmer A,  
572 Daniel R, Kleiner M, Hecker M, Schweder T. 2011. Status quo in physiological proteomics of  
573 the uncultured *Riftia pachyptila* endosymbiont. Proteomics 11:3106–3117.
- 574 23. Wilmot Jr. DB, Vetter RD. 1990. The bacterial symbiont from the hydrothermal vent  
575 tubeworm *Riftia pachyptila* is a sulfide specialist. Mar Biol 106:273–283.
- 576 24. Zal F, Lallier H, Green BN, Vinogradov SN. 1996. The multi-hemoglobin system of the  
577 hydrothermal vent tube worm *Riftia pachyptila*. II. Complete polypeptide chain composition  
578 investigated by maximum entropy analysis of mass spectra. J Biol Chem 271:8875–8881.
- 579 25. Zal F, Lallier FH, Wall JS, Vinogradov SN, Toulmond A. 1996. The multi-hemoglobin system of  
580 the hydrothermal vent tube worm *Riftia pachyptila*: I. Reexamination of the number and  
581 masses of its constituents. J Biol Chem 271:8869–8874.
- 582 26. Zal F, Leize E, Lallier FH, Toulmond A, Van Dorselaer A, Childress J. 1998. S-sulfohemoglobin



- 583 and disulfide exchange: The mechanisms of sulfide binding by *Riftia pachyptila* hemoglobins.  
584 Proc Natl Acad Sci USA 95:8997–9002.
- 585 27. Flores JF, Fisher CR, Carney SL, Green BN, Freytag JK, Schaeffer SW, Royer Jr. WE. 2005.  
586 Sulfide binding is mediated by zinc ions discovered in the crystal structure of a hydrothermal  
587 vent tubeworm hemoglobin. Proc Natl Acad Sci U S A 102:2713–2718.
- 588 28. Hourdez S, Weber RE. 2005. Molecular and functional adaptations in deep-sea hemoglobins. J  
589 Inorg Biochem 99:130–141.
- 590 29. Sanchez S, Hourdez S, Lallier FH. 2007. Identification of proteins involved in the functioning  
591 of *Riftia pachyptila* symbiosis by Subtractive Suppression Hybridization. BMC Genomics  
592 8:337.
- 593 30. Bailly X, Chabasse C, Hourdez S, Dewilde S, Martial S, Moens L, Zal F. 2007. Globin gene family  
594 evolution and functional diversification in annelids. FEBS J 274:2641–2652.
- 595 31. van der Land J, Nørrevang A. 1977. Structure and relationships of *Lamellibrachia* (Annelida,  
596 Vestimentifera). Det Kongelige Danske Videnskabernes Selskab, Biologiske Skrifter 21:3.
- 597 32. Hourdez S, Lallier FH, De Cian MC, Green BN, Weber RE, Toulmond A, Green BN, Weber RE,  
598 Toulmond A. 2000. Gas transfer system in *Alvinella pompejana* (Annelida Polychaeta,  
599 Terebellida): functional properties of intracellular and extracellular hemoglobins. Physiol  
600 Biochem Zool 73:365–373.
- 601 33. Hankeln T, Ebner B, Fuchs C, Gerlach F, Haberkamp M, Laufs TL, Roesner A, Schmidt M,  
602 Weich B, Wystub S, Saaler-Reinhardt S, Reuss S, Bolognesi M, De Sanctis D, Marden MC, Kiger  
603 L, Moens L, Dewilde S, Nevo E, Avivi A, Weber RE, Fago A, Burmester T. 2005. Neuroglobin  
604 and cytoglobin in search of their role in the vertebrate globin family. J Inorg Biochem  
605 99:110–119.
- 606 34. Mangum CP. 1992. Physiological function of the hemerythrins, p. 173–192. In C.P., M (ed.),  
607 Blood and Tissue Oxygen Carriers. Advances in Comparative and Environmental Physiology,  
608 vol 13. Springer, Berlin, Heidelberg.
- 609 35. Vanin S, Negrisolo E, Bailly X, Bubacco L, Beltramini M, Salvato B. 2006. Molecular evolution  
610 and phylogeny of sipunculan hemerythrins. J Mol Evol 62:32–41.
- 611 36. Stenkamp RE. 1994. Dioxygen and hemerythrin. Chem Rev 94:715–726.
- 612 37. Sanchez S. 2007. Approche transcriptomique pour identifier des protéines impliquées dans  
613 le fonctionnement de la symbiose *Riftia pachyptila*. Dissertation. Univ. Pierre et Marie Curie.
- 614 38. Costa-Paiva EM, Whelan N V., Waits DS, Santos SR, Schrago CG, Halanych KM. 2017.  
615 Discovery and evolution of novel hemerythrin genes in annelid worms. BMC Evol Biol 17:85.

- 616 39. Coates CJ, Decker H. 2017. Immunological properties of oxygen-transport proteins:  
617 hemoglobin, hemocyanin and hemerythrin. *Cell Mol Life Sci* 74:293–317.
- 618 40. Wittenberg JB. 2007. On optima: The case of myoglobin-facilitated oxygen diffusion. *Gene*  
619 398:156–161.
- 620 41. Bright M, Lallier FH. 2010. The biology of vestimentiferan tubeworms. *Oceanogr Mar Biol*  
621 48:213–266.
- 622 42. Demuynck S, Bocquet-Muchembled B, Deloffre L, Grumiaux F, Leprêtre A. 2004. Stimulation  
623 by cadmium of myohemerythrin-like cells in the gut of the annelid *Nereis diversicolor*. *J Exp*  
624 *Biol* 207:1101–1111.
- 625 43. Wippler J, Kleiner M, Lott C, Gruhl A, Abraham PE, Giannone RJ, Young JC, Hettich RL,  
626 Dubilier N. 2016. Transcriptomic and proteomic insights into innate immunity and  
627 adaptations to a symbiotic lifestyle in the gutless marine worm *Olavius algarvensis*. *BMC*  
628 *Genomics* 17:942.
- 629 44. Seo J-K, Nam B-H, Go H-J, Jeong M, Lee K, Cho S-M, Lee I-A, Park NG. 2016. Hemerythrin-  
630 related antimicrobial peptide, msHemerycin, purified from the body of the lugworm,  
631 *Marphysa sanguinea*. *Fish Shellfish Immunol* 57:49–59.
- 632 45. Hahlbeck E, Pospesel MA, Zal F, Childress JJ, Felbeck H. 2005. Proposed nitrate binding by  
633 hemoglobin in *Riftia pachyptila* blood. *Deep Res Part I Oceanogr Res Pap* 52:1885–1895.
- 634 46. Sanchez S, Andersen AC, Hourdez S, Lallier FH. 2007. Identification, sequencing, and  
635 localization of a new carbonic anhydrase transcript from the hydrothermal vent tubeworm  
636 *Riftia pachyptila*. *FEBS J* 274:5311–5324.
- 637 47. De Cian M-C, Bailly X, Morales J, Strub J-M, Van Dorsselaer A, Lallier F. 2003. Characterization  
638 of carbonic anhydrases from *Riftia pachyptila*, a symbiotic invertebrate from deep-sea  
639 hydrothermal vents. *PROTEINS Struct Funct Genet* 51:327–339.
- 640 48. De Cian M-C, Andersen AC, Toullec J-Y, Biegala I, Caprais J-C, Shillito B, Lallier FH. 2003.  
641 Isolated bacteriocyte cell suspensions from the hydrothermal-vent tubeworm *Riftia*  
642 *pachyptila*, a potent tool for cellular physiology in a chemoautotrophic symbiosis. *Mar Biol*  
643 142:141–151.
- 644 49. Felbeck H. 1985. CO<sub>2</sub> fixation in the hydrothermal vent tube worm *Riftia pachyptila* (Jones).  
645 *Physiol Zool* 58:272–281.
- 646 50. Felbeck H, Somero GN. 1982. Primary production in deep-sea hydrothermal vent organisms:  
647 roles of sulfide-oxidizing bacteria. *TRENDS Biochem SCI* 201–204.
- 648 51. Childress JJ, Arp AJ, Fisher Jr. CR. 1984. Metabolic and blood characteristics of the

- 649 hydrothermal vent tube-worm *Riftia pachyptila*. *Mar Biol* 83:109–124.
- 650 52. Malm S, Tiffert Y, Micklinghoff J, Schultze S, Joost I, Weber I, Horst S, Ackermann B, Schmidt  
651 M, Wohlleben W, Ehlers S, Geffers R, Reuther J, Bange FC. 2009. The roles of the nitrate  
652 reductase NarGHJI, the nitrite reductase NirBD and the response regulator GlnR in nitrate  
653 assimilation of *Mycobacterium tuberculosis*. *Microbiology* 155:1332–1339.
- 654 53. Liao L, Wankel SD, Wu M, Cavanaugh CM, Girguis PR. 2014. Characterizing the plasticity of  
655 nitrogen metabolism by the host and symbionts of the hydrothermal vent chemoautotrophic  
656 symbioses *Ridgeia piscesae*. *Mol Ecol* 23:1544–1557.
- 657 54. Sparacino-Watkins C, Stolz JF, Basu P. 2014. Nitrate and periplasmic nitrate reductases.  
658 *Chem Soc Rev* 43:676–706.
- 659 55. Hirayama C, Saito H, Konno K, Shinbo H. 1998. Purification and characterization of NADH-  
660 dependent glutamate synthase from the silkworm fat body (*Bombyx mori*). *Insect Biochem  
661 Mol Biol* 28:473–482.
- 662 56. Hirayama C, Konno K, Shinbo H. 1997. The pathway of ammonia assimilation in the  
663 silkworm, *Bombyx mori*. *J Insect Physiol* 43:959–964.
- 664 57. Scaraffia PY, Isoe J, Murillo A, Wells MA. 2005. Ammonia metabolism in *Aedes aegypti*. *Insect  
665 Biochem Mol Biol* 35:491–503.
- 666 58. Minic Z, Hervé G. 2003. Arginine metabolism in the deep sea tube worm *Riftia pachyptila* and  
667 its bacterial endosymbiont. *J Biol Chem* 278:40527–40533.
- 668 59. De Cian M-C, Regnault M, Lallier FH. 2000. Nitrogen metabolites and related enzymatic  
669 activities in the body fluids and tissues of the hydrothermal vent tubeworm *Riftia pachyptila*.  
670 *J Exp Biol* 203:2907–2920.
- 671 60. Fernandez IM, Silva M, Schuch R, Walker WA, Siber AM, Maurelli AT, McCormick BA. 2001.  
672 Cadaverine prevents the escape of *Shigella flexneri* from the phagolysosome: a connection  
673 between bacterial dissemination and neutrophil transepithelial signaling. *J Infect Dis*  
674 184:743–753.
- 675 61. Zhang M, Borovikova L V, Wang H, Metz C, Tracey KJ. 1999. Spermine inhibition of monocyte  
676 activation and inflammation. *Mol Med* 5:595–605.
- 677 62. Igarashi K, Kashiwagi K. 2010. Modulation of cellular function by polyamines. *Int J Biochem  
678 Cell Biol* 42:39–51.
- 679 63. Wallace HM, Fraser A V., Hughes A. 2003. A perspective of polyamine metabolism. *Biochem J*  
680 376:1–14.
- 681 64. Shah P, Swiatlo E. 2008. A multifaceted role for polyamines in bacterial pathogens. *Mol*

- 682 Microbiol 68:4–16.
- 683 65. Pflugfelder B, Cary SC, Bright M. 2009. Dynamics of cell proliferation and apoptosis reflect  
684 different life strategies in hydrothermal vent and cold seep vestimentiferan tubeworms. Cell  
685 Tissue Res 337:149–165.
- 686 66. Ferguson III JE, Wu Y, Smith K, Charles P, Powers K, Wang H, Patterson C. 2007. ASB4 is a  
687 hydroxylation substrate of FIH and promotes vascular differentiation via an oxygen-  
688 dependent mechanism. Mol Cell Biol 27:6407–6419.
- 689 67. Shen C, Powell-Coffman JA. 2003. Genetic analysis of hypoxia signaling and response in *C.*  
690 *elegans*. An New York Acad Sci 995:191–199.
- 691 68. Watanabe T, Fukuda I, China K, Isa Y. 2003. Molecular analyses of protein components of the  
692 organic matrix in the exoskeleton of two scleractinian coral species. Comp Biochem Physiol  
693 Part B 136:767–774.
- 694 69. Heath-Heckman EAC, Gillette AA, Augustin R, Gillette MX, Goldman WE, McFall-Ngai MJ.  
695 2014. Shaping the microenvironment: evidence for the influence of a host galaxin on  
696 symbiont acquisition and maintenance in the squid-vibrio symbiosis. Environ Microbiol  
697 16:3669–3682.
- 698 70. Ratzka C, Gross R, Feldhaar H. 2012. Endosymbiont tolerance and control within insect hosts.  
699 Insects 3:553–572.
- 700 71. Dabrowska K, Switała-Jelen K, Opolski A, Weber-Dabrowska B, Gorski A. 2005.  
701 Bacteriophage penetration in vertebrates. J Appl Microbiol 98:7–13.
- 702 72. Gardebrecht A, Markert S, Sievert SM, Felbeck H, Thürmer A, Albrecht D, Wollherr A, Kabisch  
703 J, Le Bris N, Lehmann R, Daniel R, Liesegang H, Hecker M, Schweder T. 2012. Physiological  
704 homogeneity among the endosymbionts of *Riftia pachyptila* and *Tevnia jerichonana* revealed  
705 by proteogenomics. ISME J 6:766–776.
- 706 73. Perez M, Juniper SK. 2016. Insights into symbiont population structure among three  
707 vestimentiferan tubeworm host species at eastern Pacific spreading centers. Appl Environ  
708 Microbiol 82:5197–5205.
- 709 74. Kádár E, Davis SA, Lobo-da-Cunha A. 2008. Cytoenzymatic investigation of intracellular  
710 digestion in the symbiont-bearing hydrothermal bivalve *Bathymodiolus azoricus*. Mar Biol  
711 153:995–1004.
- 712 75. Caro A, Got P, Bouvy M, Troussellier M, Gros O. 2009. Effects of long-term starvation on a  
713 host bivalve (*Codakia orbicularis*, Lucinidae) and its symbiont population. Appl Environ  
714 Microbiol 75:3304–3313.

- 715 76. Johnson MA, Fernandez C. 2001. Bacterial symbiosis in *Loripes lucinalis* (Mollusca: Bivalvia)  
716 with comments on reproductive strategy. *J Mar Biol Assoc United Kingdom* 81:251–257.
- 717 77. Stewart FJ, Cavanaugh CM. 2006. Bacterial endosymbioses in *Solemya* (Mollusca: Bivalvia)—  
718 model systems for studies of symbiont-host adaptation. *Antonie van Leeuwenhoek, Int J Gen*  
719 *Mol Microbiol* 90:343–360.
- 720 78. Bright M, Bulgheresi S. 2010. A complex journey: transmission of microbial symbionts. *Nat*  
721 *Rev Microbiol* 8:218–230.
- 722 79. Nussbaumer AD, Fisher CR, Bright M. 2006. Horizontal endosymbiont transmission in  
723 hydrothermal vent tubeworms. *Nature* 441:345–348.
- 724 80. Kuwahara H, Yoshida T, Takaki Y, Shimamura S, Nishi S, Harada M, Matsuyama K, Takishita  
725 K, Kawato M, Uematsu K, Fujiwara Y, Sato T, Kato C, Kitagawa M, Kato I, Maruyama T. 2007.  
726 Reduced genome of the thioautotrophic intracellular symbiont in a deep-sea clam,  
727 *Calyptogena okutanii*. *Curr Biol* 17:881–886.
- 728 81. Rolando M, Sanulli S, Rusniok C, Gomez-Valero L, Bertholet C, Sahr T, Margueron R,  
729 Buchrieser C. 2013. *Legionella pneumophila* effector RomA uniquely modifies host chromatin  
730 to repress gene expression and promote intracellular bacterial replication. *Cell Host Microbe*  
731 13:395–405.
- 732 82. Grininger M, Staudt H, Johansson P, Wachtveitl J, Oesterhelt D. 2009. Dodecin is the key  
733 player in flavin homeostasis of archaea. *J Biol Chem* 284:13068–13076.
- 734 83. Meissner B, Schleicher E, Weber S, Essen L-O. 2007. The dodecin from *Thermus thermophilus*,  
735 a bifunctional cofactor storage protein. *J Biol Chem* 282:33142–33154.
- 736 84. Massey V. 1994. Activation of molecular oxygen by flavins and flavoproteins. *J Biol Chem*  
737 269:22459–22462.
- 738 85. Bourdeaux F, Hammer CA, Vogt S, Schweighöfer F, Nöll G, Wachtveitl J, Grininger M. 2018.  
739 Flavin storage and sequestration by *Mycobacterium tuberculosis* dodecin. *ACS Infect Dis*  
740 4:1082–1092.
- 741 86. Wozniak RAF, Waldor MK. 2009. A toxin-antitoxin system promotes the maintenance of an  
742 integrative conjugative element. *PLoS Genet* 5:e1000439.
- 743 87. Lazzaroni J-C, Dubuisson J-F, Vianney A. 2002. The Tol proteins of *Escherichia coli* and their  
744 involvement in the translocation of group A colicins. *Biochimie* 84:391–397.
- 745 88. Yang S-C, Lin C-H, Sung CT, Fang J-Y. 2014. Antibacterial activities of bacteriocins: application  
746 in foods and pharmaceuticals. *Front Microbiol* 5:241.
- 747 89. Scott KM, Boller AJ, Dobrinski KP, Le Bris N. 2012. Response of hydrothermal vent

- 748 vestimentiferan *Riftia pachyptila* to differences in habitat chemistry. *Mar Biol* 159:435–442.
- 749 90. Childress JJ, Fisher CR, Favuzzi JA, Kochevar RE, Sanders NK, Alayse AM. 1991. Sulfide-driven  
750 autotrophic balance in the bacterial symbiont-containing hydrothermal vent tubeworm,  
751 *Riftia pachyptila* Jones. *Biol Bull* 180:135–153.
- 752 91. Girguis PR, Lee RW, Desaulniers N, Childress JJ, Pospesel M, Felbeck H, Zal F. 2000. Fate of  
753 nitrate acquired by the tubeworm *Riftia pachyptila*. *Appl Environ Microbiol* 66:2783–2790.
- 754 92. Schramm M, Wiegmann K, Schramm S, Gluschnko A, Herb M, Utermöhlen O, Krönke M. 2014.  
755 Riboflavin (vitamin B<sub>2</sub>) deficiency impairs NADPH oxidase 2 (Nox2) priming and defense  
756 against *Listeria monocytogenes*. *Eur J Immunol* 44:728–741.
- 757 93. Zeng WB, Chen WB, Yan QP, Lin GF, Qin YX. 2016. Hemerythrin is required for *Aeromonas*  
758 *hydrophilia* to survive in the macrophages of *Anguilla japonica*. *Genet Mol Res*  
759 15:gmr.15028074.
- 760
