# Supplementary material for: Host-Microbe Interactions in the Chemosynthetic Riftia pachyptila Symbiosis
Source: PubMed Central journal article supplement (PMC6918071; doi:10.1128/mbio.02243-19), 2019-12-17
Supplement: mBio.02243-19-st002.pdf [file mBio.02243-19-st002.pdf]

Supp. Table S2: Domains and protein families with a putative role in host-symbiont interactions. The domains and protein families listed here were included in the comparisons in Figure 5 and Supp. Figure S5, which show the percentage of the respective protein groups in the *Riftia* symbiont metagenome and in metagenomes of other symbiotic and free-living organisms. % bacterial, total number bacterial: Percentage and total number of bacterial species in which this domain is found in the SMART database (January 2019).

| Domain name           | Pfam/SMART annotation                                               | % bacterial (total number bacterial) | Literature/comment                                                                                                                                                                                                                                                                                                                                                                                              |
|-----------------------|---------------------------------------------------------------------|--------------------------------------|-----------------------------------------------------------------------------------------------------------------------------------------------------------------------------------------------------------------------------------------------------------------------------------------------------------------------------------------------------------------------------------------------------------------|
| Alpha-2-macroglobulin | alpha-2-macroglobulin family (A2M), including N-terminal MG1 domain | A2M: 42.05% (2057)                   | A2Ms: protease inhibitors which are important for eukaryotic innate immunity, if present in prokaryotes apparently fulfill a similar role, e.g. protection against host proteases (1)                                                                                                                                                                                                                           |
| ANAPC                 | Anaphase-promoting complex subunits                                 | APC2: 0                              | Ubiquitin ligase, important for cell cycle control in eukaryotes (2)<br>Bacterial proteins might interact with ubiquitination pathways in the host (3)                                                                                                                                                                                                                                                          |
| Ankyrin               | Ankyrin repeats                                                     | 10.88% (8348)                        | Mediate protein-protein interactions without sequence specificity (4)<br>Sponge symbiont ankyrin-repeat proteins inhibit amoebal phagocytosis (5)<br>Present in sponge microbiome metatranscriptomes, putative role in symbiont-host interactions (6)<br>Present in obligate intracellular amoeba symbiont <i>Candidatus Amoebophilus asiaticus</i> genome, probable function in interactions with the host (7) |
| Armadillo             | Armadillo repeats                                                   | 0.83% (67)                           | Eukaryotic armadillo repeats are involved in protein-protein interactions, e.g. in intracellular signaling and cytoskeletal organization (8)                                                                                                                                                                                                                                                                    |

| Domain name | Pfam/SMART annotation                   | % bacterial (total number bacterial) | Literature/comment                                                                                                                                                                                                                                                                                                                                                         |
|-------------|-----------------------------------------|--------------------------------------|----------------------------------------------------------------------------------------------------------------------------------------------------------------------------------------------------------------------------------------------------------------------------------------------------------------------------------------------------------------------------|
| Cadherin    | Cadherin domains, Cadherin-homologous   | CA: 6.4% (956)<br>CADG: 47.77% (739) | Calcium-dependent cell-cell adhesion, tissue morphogenesis in animals (9)<br><br>Present in sponge microbiome metatranscriptomes, putative role in symbiont-host interactions (6)<br><br>Putative mediation of protein interactions and cell-cell adhesion in the marine bacterium <i>Saccharophagus degradans</i> ; most cadherin-containing prokaryotes are aquatic (10) |
| Coatomer    | coatomer complex units                  | NA                                   | Formation of vesicles for intracellular transport (11)                                                                                                                                                                                                                                                                                                                     |
| coiled-coil | coiled-coil domains                     | NA                                   | Structural domain in all three domains of life, in proteins of diverse functions (12)<br><br>Virulence effectors secreted by type III secretion systems of pathogenic bacteria often contain coiled-coil domains, which e.g. could interact with host signaling pathways (13)                                                                                              |
| Dynamamin   | Dynamamin family                        | DYNc: 0                              | Large GTPases which in eukaryotes are important for vesicle scission and lipid tabulation and fission (14)<br><br>Conserved in many bacterial genomes, cellular role of bacterial dynamins not clear, could be involved in cytokinesis under osmotic stress (15)                                                                                                           |
| F-box       | ubiquitin interacting                   | 0.42% (92)                           | Present in obligate intracellular amoeba symbiont <i>Candidatus Amoebophilus asiaticus</i> genome, could interact with host ubiquitination pathways (7)<br><br>Bacterial proteins might interact with ubiquitination pathways in the host (3)                                                                                                                              |
| FG-GAP      | Extracellular repeat in alpha integrins | NA                                   | <i>Leptospira</i> FG-GAP proteins could be involved in interaction with host tissues (16)<br><br>Also see Integrin                                                                                                                                                                                                                                                         |

| Domain name     | Pfam/SMART annotation               | % bacterial (total number bacterial)    | Literature/comment                                                                                                                                                                                                                                                                                |
|-----------------|-------------------------------------|-----------------------------------------|---------------------------------------------------------------------------------------------------------------------------------------------------------------------------------------------------------------------------------------------------------------------------------------------------|
| Fibronectin     | Fibronectin (FN) and FN-like        | FN1: 0<br>FN2: 0<br>FN3: 24.19% (11706) | Present in sponge microbiome metatranscriptomes, putative role in symbiont-host interactions (6)                                                                                                                                                                                                  |
| GIDE            | E3 ubiquitin ligase                 | NA                                      | Bacterial proteins might interact with ubiquitin pathways in the host (3)                                                                                                                                                                                                                         |
| HAT             | Half A TPR repeat                   | 2.00% (86)                              | RNA and peptide binding motif, involved in RNA metabolism, related to TPR repeat, highly conserved in eukaryotes, almost all HAT proteins are found in nucleus (17)                                                                                                                               |
| He_PIG          | putative immunoglobulin             | NA                                      | See Immunoglobulin                                                                                                                                                                                                                                                                                |
| HEAT            | HEAT and HEAT-like repeats          | NA                                      | Found in eukaryotic proteins with different functions, involved in protein-protein interactions, related to armadillo and ankyrin repeats (18)                                                                                                                                                    |
| Host_attach     | bacterial attachment to host cells  | NA                                      | Required for attachment to host cells (19)                                                                                                                                                                                                                                                        |
| HYR             | hyalin repeat domain                | NA                                      | Belongs to immunoglobulin-like fold, probably involved in cell adhesion in eukaryotes (20)                                                                                                                                                                                                        |
| Immuno-globulin | Immunoglobulin, immunoglobulin-like | 1.24% (624)                             | Present in functionally diverse proteins, involved in molecular recognition, in pathogenic <i>E. coli</i> strains important for host cell infection, components of adhesins and other proteins (21)<br><br>Bacterial surface proteins could be involved in recognition between symbionts and host |

| Domain name     | Pfam/SMART annotation                        | % bacterial (total number bacterial)                                                                                 | Literature/comment                                                                                                                                                                                                                                                                                                                                              |
|-----------------|----------------------------------------------|----------------------------------------------------------------------------------------------------------------------|-----------------------------------------------------------------------------------------------------------------------------------------------------------------------------------------------------------------------------------------------------------------------------------------------------------------------------------------------------------------|
| Integrin        | Integrin alpha and beta subunits             | Int_alpha: 26.37% (1071)<br>INB: 1.2% (16)                                                                           | Integrins are important for cell adhesion and signaling in metazoans, also present in apusozoans; uncommon in prokaryotes (22)<br><br>Bacterial structures not found to be full-length integrins, but full-length beta-propeller domains are present, function unknown (23)<br><br>Could be involved in interaction with host tissues in <i>Leptospira</i> (16) |
| Laminin         | Laminin domains                              | LamNT: 0.84% (22)<br>LamB: 0<br>LamG: 6.49% (544)<br>EGF_Lam: 0                                                      | Important constituent of basement membranes in animals (24)                                                                                                                                                                                                                                                                                                     |
| Lectin          | lectins                                      | Jacalin: 7.49% (96)<br>Gal-bind_lectin: 0.08% (2)<br>B_lectin: 5.58% (219)<br>CLECT: 1.54% (263)<br>GLECT: 0.13% (3) | Carbohydrate-binding proteins, involved in immune system reaction by pathogen recognition and aggregation in vertebrates and invertebrates (25)<br><br>Virulence factors in pathogens (26)                                                                                                                                                                      |
| LPG_synthase_TM | Lysylphosphatidylglycerol synthase TM region | NA                                                                                                                   | Lysylphosphatidylglycerol synthase conveys resistance of <i>Staphylococcus aureus</i> against cationic antimicrobial peptides by modifying the cell membrane (27)                                                                                                                                                                                               |
| LppC            | bacterial outer membrane antigens            | NA                                                                                                                   | Bacterial surface proteins could be involved in recognition between symbionts and host                                                                                                                                                                                                                                                                          |
| LRR             | leucine-rich repeats                         | LRR: 6.08% (3688)<br>LRR_TYP: 5.05% (1263)                                                                           | Present in obligate intracellular amoeba symbiont <i>Candidatus Amoebophilus asiaticus</i> genome, putative function in interactions with the host (7)                                                                                                                                                                                                          |
| LTD             | lamin tail domain                            | NA                                                                                                                   | Nuclear lamins are part of the nuclear lamina, probably also involved in DNA interaction (28)                                                                                                                                                                                                                                                                   |

| Domain name   | Pfam/SMART annotation                           | % bacterial (total number bacterial) | Literature/comment                                                                                                                                                                                                                                         |
|---------------|-------------------------------------------------|--------------------------------------|------------------------------------------------------------------------------------------------------------------------------------------------------------------------------------------------------------------------------------------------------------|
| LTXXQ         | LTXXQ motif family protein                      | NA                                   | Motif in CpxP, a member of the two-component signal transduction Cpx pathway, which reacts to cell envelope stresses and misfolded proteins (29)                                                                                                           |
| MIF           | macrophage migration inhibitory factor          | NA                                   | Involved in innate immunity of vertebrates and probably of invertebrates, as well as adaptive immunity of vertebrates, also found in plants and a cyanobacterium with unclear function (30)                                                                |
| NARP1         | NMDA receptor-regulated protein 1               | NA                                   | Eukaryotic domain with similarity to cell cycle regulating yeast acetyltransferase (Pfam)                                                                                                                                                                  |
| NHL           | NCL-1, HT2A and Lin-41, similarity to WD repeat | NA                                   | Present in sponge microbiome metatranscriptomes, putative role in symbiont-host interactions (6)                                                                                                                                                           |
| Nipsnap       | NIPSNAP                                         | NA                                   | Could be involved in vesicular trafficking (31)<br>Present in sponge microbiome metatranscriptomes, putative role in symbiont-host interactions (6)                                                                                                        |
| PQQ, PQQ-like | PQQ enzyme repeat                               | 63.42% (6647)                        | Beta-propeller repeat in enzymes using pyrrolo-quinoline quinone (PQQ) as prosthetic group (Pfam)<br>Present in sponge microbiome metatranscriptomes, putative role in symbiont-host interactions (6)                                                      |
| Sel1          | TPR subfamily                                   | 61.04% (10391)                       | Present in sponge microbiome metatranscriptomes, putative role in symbiont-host interactions (6)<br>Present in obligate intracellular amoeba symbiont <i>Candidatus</i> Amoebophilus asiaticus genome, probable function in interactions with the host (7) |
| SNARE, IncA   | SNARE domain, IncA protein                      | t_SNARE: 0.07% (4)                   | Intracellular bacteria can use SNARE-like proteins (including IncA) to block host SNARE-mediated membrane fusion and thereby endocytosis (32)                                                                                                              |

| Domain name      | Pfam/SMART annotation                            | % bacterial (total number bacterial) | Literature/comment                                                                                                                                                                                                                                                                                                                                                  |
|------------------|--------------------------------------------------|--------------------------------------|---------------------------------------------------------------------------------------------------------------------------------------------------------------------------------------------------------------------------------------------------------------------------------------------------------------------------------------------------------------------|
| TIR              | Toll-interleukin-receptor                        | 1.04% (47)                           | Protein-protein interaction domain in innate immune system proteins of plants and animals, present in pathogenic and non-pathogenic bacteria, TIR domain-containing proteins of pathogens can interfere with host immune system (33)                                                                                                                                |
| TPR              | tetratricopeptide repeats                        | 51.13% (33476)                       | Present in sponge microbiome metatranscriptomes, putative role in symbiont-host interactions (6)<br><br>Present in obligate intracellular amoeba symbiont <i>Candidatus</i> Amoebophilus asiaticus genome, probable function in interactions with the host (7)<br><br>TPR-containing bacterial proteins can have impact on phagocytosis of bacteria by amoebae (34) |
| TSP              | thrombospondins                                  | TSP1: 0.15% (16)<br>TSPN: 0.18% (6)  | Extracellular glycoproteins in animals, involved in cell attachment in vertebrates (35)                                                                                                                                                                                                                                                                             |
| TTL              | tubulin-tyrosine ligase family                   | NA                                   | Tubulin posttranslational modification (tyrosination), essential for cell development (36)                                                                                                                                                                                                                                                                          |
| U-box            | ubiquitin interacting                            | 0.44% (19)                           | Present in obligate intracellular amoeba symbiont <i>Candidatus</i> Amoebophilus asiaticus genome, could interact with host ubiquitination pathways (7)<br><br>Bacterial proteins might interact with ubiquitination pathways in the host (3)                                                                                                                       |
| UB activating E1 | Domain of ubiquitin activating E1 family enzymes | UBA_E1_c: 0                          | Bacterial proteins might interact with ubiquitination pathways in the host (3)                                                                                                                                                                                                                                                                                      |
| UBA              | ubiquitin associated domain                      | 0.61% (48)                           | Bacterial proteins might interact with ubiquitination pathways in the host (3)                                                                                                                                                                                                                                                                                      |

| <b>Domain name</b> | <b>Pfam/SMART annotation</b>             | <b>% bacterial (total number bacterial)</b> | <b>Literature/comment</b>                                                                                                                                                                                                                                                                                                                                     |
|--------------------|------------------------------------------|---------------------------------------------|---------------------------------------------------------------------------------------------------------------------------------------------------------------------------------------------------------------------------------------------------------------------------------------------------------------------------------------------------------------|
| VIT                | Vault protein Inter-alpha-Trypsin domain | 0                                           | Conserved domain in the inter-alpha-trypsin inhibitor heavy chain family, one of the precursor proteins of inter-alpha-trypsin inhibitors, which are protease inhibitors and involved in stabilization of the extracellular matrix (37)                                                                                                                       |
| VWA                | Von Willebrand factor type A domain      | 47.46% (20119)                              | Domain involved in eukaryotes in protein-protein interactions, multiprotein complexes, extracellular matrix, cell adhesion, various intracellular functions; prokaryotic proteins mostly not well characterized, characterized bacterial proteins with different functions; some prokaryotic VWA proteins possibly acquired via horizontal gene transfer (38) |
| WD40, PD40         | WD40, WD40-like repeats                  | WD40: 5.54% (5471)                          | WD40 repeat proteins are highly abundant proteins in eukaryotes, involved in various functions; comparatively rare in prokaryotes, here putatively also involved in different functions, enriched in Cyanobacteria and Planctomycetes (39)                                                                                                                    |

## References

1. Wong SG, Dessen A. 2014. Structure of a bacterial  $\alpha$ 2-macroglobulin reveals mimicry of eukaryotic innate immunity. *Nat Commun* 5:4917.
2. Peters J-M. 2006. The anaphase promoting complex/cyclosome: a machine designed to destroy. *Nat Rev Mol Cell Biol* 7:644–656.
3. Rytkönen A, Holden DW. 2007. Bacterial interference of ubiquitination and deubiquitination. *Cell Host Microbe* 1:13–22.
4. Li J, Mahajan A, Tsai M-D. 2006. Ankyrin repeat: a unique motif mediating protein-protein interactions. *Biochemistry* 45:15168–15178.
5. Nguyen MTHD, Liu M, Thomas T. 2014. Ankyrin-repeat proteins from sponge symbionts modulate amoebal phagocytosis. *Mol Ecol* 23:1635–1645.
6. Díez-Vives C, Moitinho-Silva L, Nielsen S, Reynolds D, Thomas T. 2017. Expression of eukaryotic-like protein in the microbiome of sponges. *Mol Ecol* 26:1432–1451.
7. Schmitz-Esser S, Tischler P, Arnold R, Montanaro J, Wagner M, Rattei T, Horn M. 2010. The genome of the amoeba symbiont “*Candidatus Amoebohilus asiaticus*” reveals common mechanisms for host cell interaction among amoeba-associated bacteria. *J Bacteriol* 192:1045–1057.
8. Coates JC. 2003. Armadillo repeat proteins: beyond the animal kingdom. *Trends Cell Biol* 13:463–471.
9. Koch AW, Manzur KL, Shan W. 2004. Structure-based models of cadherin-mediated cell adhesion: the evolution continues. *Cell Mol Life Sci* 61:1884–1895.
10. Fraiberg M, Borovok I, Weiner RM, Lamed R. 2010. Discovery and characterization of cadherin domains in *Saccharophagus degradans* 2-40. *J Bacteriol* 192:1066–1074.
11. Wang S, Zhai Y, Pang X, Niu T, Ding Y-H, Dong M-Q, Hsu VW, Sun Z, Sun F. 2016. Structural characterization of coatomer in its cytosolic state. *Protein Cell* 7:586–600.
12. Truebestein L, Leonard TA. 2016. Coiled-coils: the long and short of it. *BioEssays* 38:903–916.
13. Delahay RM, Frankel G. 2002. Coiled-coil proteins associated with type III secretion systems: a versatile domain revisited. *Mol Microbiol* 45:905–916.
14. Praefcke GJK, McMahan HT. 2004. The dynamin superfamily: universal membrane tubulation and fission molecules? *Nat Rev Mol Cell Biol* 5:133–147.
15. Bramkamp M. 2012. Structure and function of bacterial dynamin-like proteins. *Biol Chem* 393:1203–1214.
16. Chou LF, Chen YT, Lu CW, Ko YC, Tang CY, Pan MJ, Tian YC, Chiu CH, Hung CC, Yang CW. 2012. Sequence of *Leptospira santarosai* serovar Shermani genome and prediction of virulence-associated genes. *Gene* 511:364–370.
17. Hammani K, Cook WB, Barkan A. 2012. RNA binding and RNA remodeling activities of the half- $\alpha$ -tetratricopeptide (HAT) protein HCF107 underlie its effects on gene expression. *Proc Natl Acad Sci* 109:5651–5656.
18. Yoshimura SH, Hirano T. 2016. HEAT repeats – versatile arrays of amphiphilic helices working in crowded environments? *J Cell Sci* 129:3963–3970.
19. Matthyse AG, Yarnall H, Boles SB, McMahan S. 2000. A region of the *Agrobacterium tumefaciens* chromosome containing genes required for virulence and attachment to host cells. *Biochim Biophys Acta* 1490:208–212.



20. Callebaut I, Gilgès D, Vigon I, Mornon J. 2000. HYR, an extracellular module involved in cellular adhesion and related to the immunoglobulin-like fold. *Protein Sci* 9:1382–1390.
21. Bodelón G, Palomino C, Fernández LÁ. 2013. Immunoglobulin domains in *Escherichia coli* and other enterobacteria: From pathogenesis to applications in antibody technologies. *FEMS Microbiol Rev* 37:204–250.
22. Sebé-Pedrós A, Roger AJ, Lang FB, King N, Ruiz-Trillo I. 2010. Ancient origin of the integrin-mediated adhesion and signaling machinery. *Proc Natl Acad Sci USA* 107:10142–10147.
23. Chouhan B, Denesyuk A, Heino J, Johnson MS, Denessiouk K. 2011. Conservation of the human integrin-type beta-propeller domain in bacteria. *PLoS One* 6:e25069.
24. Sasaki T, Fässler R, Hohenester E. 2004. Laminin: the crux of basement membrane assembly. *J Cell Biol* 164:959–963.
25. Fujita T. 2002. Evolution of the lectin-complement pathway and its role in innate immunity. *Nat Rev Immunol* 2:346–353.
26. Imberty A, Wimmerová M, Mitchell EP, Gilboa-Garber N. 2004. Structures of the lectins from *Pseudomonas aeruginosa*: insights into the molecular basis for host glycan recognition. *Microbes Infect* 6:221–228.
27. Staubitz P, Neumann H, Schneider T, Wiedemann I, Peschel A. 2004. MprF-mediated biosynthesis of lysylphosphatidylglycerol, an important determinant in staphylococcal defensin resistance. *FEMS Microbiol Lett* 231:67–71.
28. Stuurman N, Heins S, Aebi U. 1998. Nuclear lamins: their structure, assembly, and interactions. *J Struct Biol* 122:42–66.
29. Zhou X, Keller R, Volkmer R, Krauss N, Scheerer P, Hunke S. 2011. Structural basis for two-component system inhibition and pilus sensing by the auxiliary CpxP protein. *J Biol Chem* 286:9805–9814.
30. Sparkes A, De Baetselier P, Roelants K, De Trez C, Magez S, Van Ginderachter JA, Raes G, Bucala R, Stijlemans B. 2017. The non-mammalian MIF superfamily. *Immunobiology* 222:858–867.
31. Lee AH, Zareei MP, Daefler S. 2002. Identification of a NIPSNAP homologue as host cell target for *Salmonella* virulence protein SpiC. *Cell Microbiol* 4:739–750.
32. Paumet F, Wesolowski J, Garcia-Diaz A, Delevoye C, Aulner N, Shuman HA, Subtil A, Rothman JE. 2009. Intracellular bacteria encode inhibitory SNARE-like proteins. *PLoS One* 4:e7375.
33. Ve T, Williams SJ, Kobe B. 2015. Structure and function of Toll/interleukin-1 receptor/resistance protein (TIR) domains. *Apoptosis* 20:250–261.
34. Reynolds D, Thomas T. 2016. Evolution and function of eukaryotic-like proteins from sponge symbionts. *Mol Ecol* 25:5242–5253.
35. Adams JC, Lawler J. 2004. The thrombospondins. *Int J Biochem Cell Biol* 36:961–968.
36. Prota AE, Magiera MM, Kuijpers M, Bargsten K, Frey D, Wieser M, Jaussi R, Hoogenraad CC, Kammerer RA, Janke C, Steinmetz MO. 2013. Structural basis of tubulin tyrosination by tubulin tyrosine ligase. *J Cell Biol* 200:259–270.
37. Himmelfarb M, Klopocki E, Grube S, Staub E, Klamann I, Hinzmänn G, Kristiansen G, Rosenthal A, Dürst M, Dahl E. 2004. *ITIH5*, a novel member of the inter- $\alpha$ -trypsin inhibitor heavy chain family is downregulated in breast cancer. *Cancer Lett* 204:69–77.
38. Whittaker CA, Hynes RO. 2002. Distribution and evolution of von Willebrand/integrin A domains: widely dispersed domains with roles in cell adhesion and elsewhere. *Mol Biol Cell* 13:3369–3387.
39. Hu XJ, Li T, Wang Y, Xiong Y, Wu X-H, Zhang D-L, Ye Z-Q, Wu Y-D. 2017. Prokaryotic and highly-repetitive WD40 proteins: a systematic study. *Nat Sci Reports* 7:10585.
