# Supplementary material for: Host-Microbe Interactions in the Chemosynthetic Riftia pachyptila Symbiosis
Source: PubMed Central journal article supplement (PMC6918071; doi:10.1128/mbio.02243-19), 2019-12-17
Supplement: mBio.02243-19-st003.pdf [file mBio.02243-19-st003.pdf]

Supp. Table S3: Transcriptome completeness for the four different *Riftia* transcriptome assemblies based on the BUSCO eukaryote and metazoan datasets. C: complete BUSCOs, S: complete and single-copy BUSCOs, D: complete and duplicated BUSCOs, F: fragmented BUSCOs, M: missing BUSCOs. Assembly 4 was used for all further analyses.

| <b>Assembly</b> | <b>Completeness [%]</b>                    |                                            |
|-----------------|--------------------------------------------|--------------------------------------------|
|                 | <i>Eukaryota</i>                           | <i>Metazoa</i>                             |
| <b>1</b>        | C: 99.0 [S: 32.3, D: 66.7], F: 1.0, M: 0.0 | C: 98.3 [S: 31.4, D: 66.9], F: 0.9, M: 0.8 |
| <b>2</b>        | C: 99.0 [S: 33.0, D: 66.0], F: 0.7, M: 0.3 | C: 98.3 [S: 32.5, D: 65.8], F: 0.9, M: 0.8 |
| <b>3</b>        | C: 99.0 [S: 36.0, D: 63.0], F: 1.0, M: 0.0 | C: 98.4 [S: 39.7, D: 58.7], F: 0.9, M: 0.7 |
| <b>4</b>        | C: 99.3 [S: 33.0, D: 66.3], F: 0.7, M: 0.0 | C: 98.8 [S: 37.1, D: 61.7], F: 0.7, M: 0.5 |
